1                    **Selective Sweep at a QTL in a Randomly Fluctuating Environment**

2

3

Luis-Miguel Chevin

4

5

6    Centre d'Ecologie Fonctionnelle et Evolutive (CEFE), CNRS, University of Montpellier, University of  
7    Paul Valéry Montpellier 3, EPHE, IRD, Montpellier, France.

8

9

10   UMR 5175, 1919 Route de Mende, 34293 Montpellier Cedex 5, France.

11   E-mail: [Luis-Miguel.chevin@cefe.cnrs.fr](mailto:Luis-Miguel.chevin@cefe.cnrs.fr)

12 **Abstract**

13 Adaptation is mediated by phenotypic traits that are often near continuous, and undergo selective  
14 pressures that may change with the environment. The dynamics of allelic frequencies at underlying  
15 quantitative trait loci (QTL) depend on their own phenotypic effects, but also possibly on other  
16 polymorphic loci affecting the same trait, and on environmental change driving phenotypic selection.  
17 Most environments include a substantial component of random noise, characterized by both its  
18 magnitude and its temporal autocorrelation, which sets the timescale of environmental predictability. I  
19 investigate the dynamics of a mutation affecting a quantitative trait in an autocorrelated stochastic  
20 environment that causes random fluctuations of an optimum phenotype. The trait under selection may  
21 also exhibit background polygenic variance caused by many polymorphic loci of small effects elsewhere  
22 in the genome. In addition, the mutation at the QTL may affect phenotypic plasticity, the phenotypic  
23 response of given genotype to its environment of development or expression. Stochastic environmental  
24 fluctuations increases the variance of the evolutionary process, with consequences for the probability of  
25 a complete sweep at the QTL. Background polygenic variation critically alters this process, by setting  
26 an upper limit to stochastic variance of population genetics at the QTL. For a plasticity QTL, stochastic  
27 fluctuations also influences the expected selection coefficient, and alleles with the same expected  
28 trajectory can have very different stochastic variances. Finally, a mutation may be favored through its  
29 effect on plasticity despite causing a systematic mismatch with optimum, which is compensated by  
30 evolution of the mean background phenotype.

31

32 **Keywords:** Fluctuating selection, stochastic environment, temporal autocorrelation, polygenic  
33 adaptation, phenotypic plasticity.

34

## 35 Introduction

36 The advent of population genomics and next-generation sequencing has fostered the hope that the search  
37 for molecular signatures of adaptation would reach a new era, wherein the recent evolutionary history  
38 of a species would be inferred precisely and somewhat exhaustively, and fine details of the genetics of  
39 adaptation would be revealed (Stapley *et al.* 2010). Despite undisputable successes, the picture that has  
40 emerged in the last decade is more complex. First, the importance of polygenic variation in adaptation  
41 has been re-evaluated based on theoretical and empirical arguments (Chevin and Hospital 2008; Pavlidis  
42 *et al.* 2008; Pritchard *et al.* 2010; Rockman 2012; Jain and Stephan 2017; Stetter *et al.* 2018; Höllinger  
43 *et al.* 2019), and methods have been designed to detect subtle frequency changes at multiple loci that  
44 may jointly cause substantial phenotypic evolution (Turchin *et al.* 2012; Berg and Coop 2014; Stephan  
45 2016; Wellenreuther and Hansson 2016; Racimo *et al.* 2018; Josephs *et al.* 2019). Consistent with (but  
46 not limited to) polygenic adaptation is the idea that mutations contributing to adaptive evolution do not  
47 necessarily start sweeping when they arise in the population, but may instead segregate for some time  
48 in the population and contribute to standing genetic variation, before they become selected as the  
49 environment changes (Barrett and Schluter 2008; Kopp and Hermisson 2009; Matuszewski *et al.* 2015;  
50 Jain and Stephan 2017). After the factors governing such “soft sweeps” and their influence on neutral  
51 polymorphism have been characterized (Hermisson and Pennings 2005; Przeworski *et al.* 2005), the  
52 debate has shifted to their putative prevalence in molecular data, and perhaps more importantly to their  
53 contribution to adaptive evolution (Jensen 2014; Garud *et al.* 2015; Hermisson and Pennings 2017).

54 Another line of complexity in the search for molecular footprints of adaptation comes from temporal  
55 variation in selection. The classical hitchhiking model (Maynard-Smith and Haigh 1974; Stephan *et al.*  
56 1992) posits a constant selection coefficient without specifying its origin. Some models have gone a step  
57 further by explicitly including a phenotype under selection, and have shown that even in a constant  
58 environment, selection at a given locus may change over the course of a selective sweep, as the mean  
59 phenotype in the background evolves through the effects of other polymorphic loci, in a form of whole-  
60 genome epistasis mediated by the phenotype (Lande 1983; Chevin and Hospital 2008; Matuszewski *et al.*  
61 *et al.* 2015). In addition, selection is likely to vary in time because of a changing environment. Most  
62 environments exhibit substantial fluctuations over time, beyond any trend or large shifts (Stocker *et al.*  
63 2013). These fluctuations are likely to affect natural selection, which emerges from an interaction of the  
64 phenotype of an organism with its environment. Interestingly, one of the first attempts to measure  
65 selection through time in the wild revealed substantial fluctuations in strength and magnitude (Fisher  
66 and Ford 1947), spurring a heated debate about the relative importance of drift versus selection in  
67 evolution, and setting the stage for the neutralist-selectionist debate (Wright 1948; Kimura 1968;  
68 Yamazaki and Maruyama 1972; Gillespie 1977). Other iconic examples of adaptive evolution also show  
69 clear evidence for fluctuating selection (Lynch 1987; Grant and Grant 2002; Bell 2010; Bergland *et al.*  
70 2014; Nosil *et al.* 2018), suggesting that selection *in natura* is rarely purely directional, but instead often

71 includes some component of temporal fluctuations. Part of these fluctuations involve deterministic,  
72 periodic cycles, such as seasonal genomic changes in fruit flies (Bergland *et al.* 2014), but random  
73 environmental variation also certainly plays a substantial role. In fact, virtually all natural environments  
74 exhibit some stochastic noise, characterized not only by its magnitude but also by its temporal  
75 autocorrelation, which determines the average speed of fluctuations and the time scale of environmental  
76 predictability (Halley 1996; Vasseur and Yodzis 2004). The influence of such environmental noise on  
77 natural populations is attested notably by stochasticity in population dynamics (Lande *et al.* 2003;  
78 Ovaskainen and Meerson 2010), and natural selection at the phenotypic level has also been estimated as  
79 a stochastic process in a few case studies (Engen *et al.* 2012; Chevin *et al.* 2015; Gamelon *et al.* 2018).

80 Population genetics theory has a long history of investigating randomly fluctuating selection. In  
81 particular, Wright (1948) used diffusion theory to derive the stationary distribution of allelic frequencies  
82 in a stochastic environment, which was later extended to find the probability of quasi-fixation in an  
83 infinite population (Kimura 1954), and of fixation in a finite population (Ohta 1972). This topic gained  
84 prominence during the neutralist-selection debate, where the relative influences of genetic drift vs a  
85 fluctuating environment as alternative sources of stochasticity in population genetics was strongly  
86 debated with respect to the maintenance of polymorphism and molecular heterozygosity (Nei 1971;  
87 Gillespie 1973, 1977, 1979, 1991; Nei and Yokoyama 1976; Takahata and Kimura 1979), a question  
88 that remains disputed in the genomics era (Mustonen and Lassig 2007, 2010; Miura *et al.* 2013). Another  
89 line of research has asked what is the expected relative fitness of a genotype/phenotype in a fluctuating  
90 environment, and whether Wright's (1937) adaptive landscape could be extended to this context (Lande  
91 2007; Lande *et al.* 2009).

92 However, this literature is mostly disconnected from the literature on adaptation of quantitative traits  
93 to a randomly changing environment (Bull 1987; Lande and Shannon 1996; Chevin 2013; Tufto 2015).  
94 Even in work that investigates fluctuating selection both at a single locus and on a quantitative trait (e.g.  
95 Lande 2007), the selection coefficient at the single locus is often postulated ad hoc, rather than stemming  
96 from its effect on a trait under selection. Connallon and Clark (2015) recently investigated the influence  
97 of a randomly fluctuating optimum phenotype on the distribution of fitness effects of mutations affecting  
98 a trait, but they assumed non-autocorrelated fluctuations, and did not derive the stochastic variance of  
99 the population genetic process, which is important driver of probabilities of (quasi-)fixation (Kimura  
100 1954; Ohta 1972). They also did not consider fitness epistasis caused by evolution of the mean  
101 background phenotype. Lastly, this work has largely overlooked possible mutation effects on phenotypic  
102 plasticity, the phenotypic response of a given genotype to its environment of development or expression  
103 (Schlichting and Pigliucci 1998; West-Eberhard 2003), which is expected to evolve in environments  
104 that fluctuate with some predictability (Gavrilets and Scheiner 1993a; Lande 2009; Tufto 2015). Instead,  
105 Connallon and Clark (2015) included a form of environmental noise in phenotypic expression that is  
106 similar to bet hedging (Svardal *et al.* 2011; Tufto 2015).

107 I here extend a model that combines population and quantitative genetics (Lande 1983; Chevin and  
108 Hospital 2008) to the context of an autocorrelated random environment causing movements of an  
109 optimum phenotype, to ask: What is the distribution of allelic frequencies at a QTL in a stochastic  
110 environment? How does it depend on whether a mutation is segregating alone, or instead affects a  
111 quantitative trait with polygenic background variation? How does environmental stochasticity affect the  
112 probability of a complete sweep at the QTL, and the resulting genetic architecture of the trait? And how  
113 are these effects altered when the mutation affects phenotypic plasticity?

## 114 **Model**

### 115 ***Fluctuating selection***

116 The core assumption of the model is that adaptation is mediated by a continuous, quantitative trait  
117 undergoing stabilizing selection towards an optimum phenotype that moves in response to the  
118 environment, as typical in models of adaptation to a changing environment (reviewed by Kopp and  
119 Matuszewski 2014). More precisely, the expected number of offspring in the next generation (assuming  
120 discrete non-overlapping generations) of individuals with phenotype  $z$  is

$$W_t(z) = W_{\max} \exp\left(-\frac{(z - \theta_t)^2}{2\omega^2}\right) \quad (1)$$

121 where  $\theta_t$  is the optimum phenotype at generation  $t$ , and  $\omega$  is the width of the fitness peak, which  
122 determines the strength of stabilizing selection. The height of the fitness peak  $W_{\max}$  may affect  
123 demography but not evolution, as it is independent of the phenotype.

124 In line with other models of adaptation to changing environments (Kopp and Matuszewski 2014), I  
125 assume that the environment causes movement of the optimum phenotype, but does not affect the width  
126 of the fitness function. The environment undergoes stationary random fluctuations, which may be  
127 combined initially to a major, deterministic environmental shift of the mean environment. The stochastic  
128 component of variation in the optimum is assumed to be autocorrelated, in the form of a first-order  
129 autoregressive process (AR1) with stationary variance  $\sigma_\theta^2$  and autocorrelation  $\rho$  over unit time step (one  
130 generation). This is one of the simplest forms of autocorrelated continuous process: it is Markovian  
131 (memory over one time step only), leading to an exponentially decaying autocorrelation function with  
132 half-time  $T_{\text{half}} = -\ln(2)/\ln(\rho)$  generations.

### 133 ***Genetics***

134 For simplicity, I base the argument on a haploid model, but much of the findings extend to diploids,  
135 with a few additional complications such as over-dominance caused by selection towards an optimum  
136 (Barton 2001; Sellis *et al.* 2011). I focus on a mutation at a locus affecting the quantitative trait – i.e., a  
137 quantitative trait locus, or QTL –, with additive haploid effect  $\alpha$  on the trait. More precisely, I consider  
138 a bi-allelic QTL, with mean phenotype  $m$  for the wild-type (ancestral) allele, in frequency  $q = 1 - p$ ,

139 and  $m + \alpha$  for the mutant (derived) allele, in frequency  $p$ . We are not interested here in the origin and  
140 initial spread of the mutation from initially very low, drift-dominated frequencies. Investigating this  
141 would require extending theory of fixation probabilities in changing environments (Uecker and  
142 Hermisson 2011) to include environmental stochasticity, which is beyond the scope of this work.  
143 Instead, the focus is here on adaptation from standing genetic variation, and the aim will be to track the  
144 evolutionary trajectory of a focal mutation at a bi-allelic locus, starting from a low initial frequency  $p_0$   
145 where most of frequency change can be attributed to selection. We will briefly address the influence of  
146 drift at the end of the analysis.

147 Two types of genetic scenarios will be contrasted. In the “monomorphic background” scenario, no  
148 other polymorphic locus affects the quantitative trait when the focal mutation is segregating at the QTL.  
149 This corresponds to a form of strong selection weak mutation approximation (SSWM Gillespie 1983,  
150 1991). This scenario requires no further assumption about the reproduction system (sexual or asexual).  
151 In the opposite “polygenic background” scenario, variation in the trait is assumed to be caused by a large  
152 number of weak-effect loci (or “minor genes”), in addition to the effect of the QTL (or “major gene”).  
153 Sexual reproduction is assumed, with fertilization closely followed by meiosis over a short diploid phase  
154 where selection can be neglected. I further assume that minor genes are unlinked among themselves and  
155 with the major gene, such that the genotypic background has a similar distribution for all alleles at the  
156 major gene. Following standard quantitative genetics (Falconer and MacKay 1996; Lynch and Walsh  
157 1998), I assume that additive genetic values in the background are normally distributed, with mean  
158 phenotype  $m$  and additive genetic variance  $G$ , and that phenotypes also include a residual component of  
159 variation independent from genotype, with mean 0 and variance  $V_e$ . This model of major gene and  
160 polygenes, which takes its roots in Fisher’s (1918) foundational paper for quantitative genetics, has been  
161 analyzed for evolutionary genetics by Lande (1983), and later used to investigate selective sweeps at a  
162 QTL in constant environment or following an abrupt environmental shift by Chevin and Hospital (2008).  
163 I here extend this work to a randomly changing environment.

### 164 ***Phenotypic plasticity***

165 I also investigate the case where both the mean background phenotype and the QTL effect may respond  
166 to the environment, *via* phenotypic plasticity. Let  $\varepsilon$  be a normally distributed environmental variable  
167 (e.g. temperature, humidity...) with mean  $\bar{\varepsilon}$  and variance  $\sigma_\varepsilon^2$ , which affects the development or  
168 expression of the trait. Assuming a linear reaction norm for simplicity, the mean background phenotype  
169 is

$$m = a_m + b_m \varepsilon, \quad (2)$$

170 where  $b_m$  is the slope of reaction norm, which quantifies phenotypic plasticity, and the intercept  $a_m$  is  
171 the trait value in a reference environment where  $\varepsilon = 0$  by convention. I neglect evolution of plasticity  
172 in the background for simplicity, and therefore assume that  $b_m$  is a constant, while  $a_m$  is a polygenic

173 trait with additive genetic variance  $G$  as before. The additive effect of the mutation at the QTL is also  
174 phenotypically plastic, such that

$$\alpha = a_\alpha + b_\alpha \varepsilon, \quad (3)$$

175 with  $b_\alpha$  the additive increase in plasticity caused by the mutation at the QTL, and  $a_\alpha$  the additive effect  
176 on the trait in the reference environment.

177 The environment of development partly predicts changes of the optimum phenotype for selection,  
178 such that

$$\theta = a_\theta + b_\theta \varepsilon + \xi, \quad (4)$$

179 where  $\xi$  is normal deviate independent from  $\varepsilon$ , with mean 0 and variance  $\sigma_\xi^2 = \sqrt{\sigma_\theta^2 - b_\theta^2 \sigma_\varepsilon^2}$ , such that  
180 the variance of optimum remains  $\sigma_\theta^2$ . Note that eq. (4) does not necessarily imply a causal relationship  
181 between  $\varepsilon$  and  $\theta$ , because selection occurs after development/expression of the plastic phenotype and is  
182 thus likely to be influenced by a later environment (Gavrilets and Scheiner 1993a; Lande 2009). In fact,  
183 the optimum may even respond to other environmental variables than  $\varepsilon$ , which jointly constitute the  
184 cause of selection (Wade and Kalisz 1990; MacColl 2011), but can be partly predicted by  $\varepsilon$  upon  
185 development. In this case  $b_\theta$  is the product of the regression slope of the optimum on the causal  
186 environment for selection, times the regression slope of this causal environment on the environment of  
187 development  $\varepsilon$  (de Jong 1990; Gavrilets and Scheiner 1993a; Chevin and Lande 2015). When the same  
188 environmental variable affects development and selection but at different times, then the latter regression  
189 slope is simply the autocorrelation of the environment between development and selection within a  
190 generation (Lande 2009; Michel *et al.* 2014).

## 191 **Evolutionary dynamics**

192 Lande (1983) has shown that the joint dynamics of a major gene and normally distributed polygenes in  
193 response to selection are governed by a couple of equations that are remarkably identical to their  
194 counterpart without polygenes and without a major gene, respectively. In other words, Wright's (1937)  
195 fitness landscape for genes and Lande's (1976) fitness landscape for quantitative traits jointly apply in  
196 the context of major gene combined with polygene. For a haploid sexual population, the recursions for  
197 the allelic frequency  $p$  of the mutation at the major gene and for the mean phenotype  $m$  in the polygenic  
198 background are then

$$\Delta p = pq \frac{\partial \ln \bar{W}}{\partial p} \quad (5)$$

$$\Delta m = G \frac{\partial \ln \bar{W}}{\partial m}, \quad (6)$$

199 where the partial derivatives are selection gradients on allelic frequency and mean phenotype,  
200 respectively (Wright 1937; Lande 1976).

201 With selection towards an optimum as modeled in equation (1), and an overall phenotype distribution  
 202 that is a mixtures of two Gaussians with same variance  $G + V_e$  and modes separated by the effect of the  
 203 major gene  $\alpha$ , the mean fitness in the population is

$$\bar{W} = W_{\max} \sqrt{S\omega^2} \left[ p \exp\left(-\frac{S}{2}(m + \alpha - \theta)^2\right) + q \exp\left(-\frac{S}{2}(m - \theta)^2\right) \right], \quad (7)$$

204 where  $S = \frac{1}{\omega^2 + G + V_e}$  is the strength of stabilizing selection. Combining eqs (6) and (7), the selection  
 205 gradient on the mean background phenotype is

$$\frac{\partial \ln \bar{W}}{\partial m} = -S(m + p'\alpha - \theta). \quad (8)$$

206 As in classical models of moving optimum for quantitative traits (Lande 1976; Kopp and Hermisson  
 207 2007), directional selection on the trait is proportional to the deviation of the mean phenotype from the  
 208 optimum, multiplied by the strength of stabilizing selection, which is larger when the fitness peak is  
 209 narrower. However here, the overall mean phenotype depends on  $p'$ , the frequency after selection of the  
 210 mutation at the QTL. This causes a coupling of dynamics in the background and at the QTL.

211 For the dynamics at the QTL it will be convenient to focus on the logit allelic frequency of the  
 212 mutation,  $\psi = \ln(p/q)$ . With a constant selection coefficient  $s$  as assumed in classical models of  
 213 selective sweeps,  $\psi$  would increase linearly in time with slope  $s$  (Stephan *et al.* 1992), while  $\psi$  changes  
 214 non linearly in time even in a constant environment if the mutation is dominant/recessive (Teshima and  
 215 Przeworski 2006), or if it affects a quantitative trait with polygenic background variation as assumed  
 216 here (Chevin and Hospital 2008). Combining eqs. (5) and (7), after some simple algebra the recursion  
 217 for  $\psi$  over one generation of selection is

$$\Delta\psi = \ln\left(\frac{W_A}{W_a}\right) = -\frac{S\alpha}{2} [\alpha + 2(m - \theta)]. \quad (9)$$

218 Note that  $\Delta\psi$  is a measure of the selection coefficient  $s$  for this generation (Chevin 2011). In a constant  
 219 environment where  $\theta_t = \theta$  for all  $t$ , the system admits two stable equilibria with fixation at the QTL,

$$\begin{aligned} p = 0, \quad m = \theta \\ p = 1, \quad m = \theta - \alpha \end{aligned} \quad (10)$$

220 and one unstable internal equilibrium

$$p = \frac{1}{2}, \quad m = \theta - \frac{\alpha}{2}, \quad (11)$$

221 in line with previous analysis of the diploid version of this model (Lande 1983). Note that the mean  
 222 background phenotype evolves to compensate for the effect of the major gene, such that the overall  
 223 mean phenotype is at the optimum in all three equilibria,  $m + p\alpha = \theta$ .

## 224 **Approximation for weak fluctuating selection at QTL**

225 The full model with coupled dynamics at the major gene and background polygenes can be used for  
 226 numerical recursions, but to make further analytical progress, I rely on an approximation of this model



227 that neglects the influence of the QTL on the background mean phenotype, as in previous analysis in a  
228 constant environment (Chevin and Hospital 2008). In a randomly fluctuating environment, this  
229 approximation consists of assuming that selection at the QTL is sufficiently weak that its contribution  
230 to fluctuating selection on the mean background phenotype can be neglected, such that variance in the  
231 directional selection gradient is proportional to

$$\text{var}(m + p'\alpha - \theta) \approx \text{var}(m - \theta), \quad (12)$$

232 and similarly for its covariance across generations.

### 233 **Simulations**

234 The mathematical analysis of this model is complemented by population-based simulations under a  
235 randomly fluctuating optimum. These simulations are based on recursions of equations (5-7), assuming  
236 a constant additive genetic variance  $G$  in the background. In each simulation, the optimum is initially  
237 drawn from a normal distribution with mean 0 and variance  $\sigma_\theta^2$ , and optima in subsequent generations  
238 are drawn using  $\theta_t = \rho\theta_{t-1} + \sigma_\theta\sqrt{1-\rho^2}X$ , where  $X$  is a standard normal deviate, such that  $\theta$  has  
239 stationary variance  $\sigma_\theta^2$  and autocorrelation  $\rho$  as required. In simulations with phenotypic plasticity, the  
240 environment of development is drawn retrospectively from the optimum, using  $\varepsilon_t = \frac{\sigma_\varepsilon^2}{\sigma_\theta^2} b_\theta \theta_t +$   
241  $\sigma_\varepsilon\sqrt{1 - \left(b_\theta \frac{\sigma_\varepsilon}{\sigma_\theta}\right)^2} Y$ , where  $Y$  is drawn from a standard normal, such that  $\varepsilon$  has variance  $\sigma_\varepsilon^2$  and the  
242 regression slope of  $\theta$  on  $\varepsilon$  is  $b_\theta$ , as required (eq. 4). In simulations with background genetic variance,  
243 the system is left to evolve for 500 generations, to allow the mean background phenotype to reach a  
244 stationary distribution with respect to the fluctuating environment. The initial frequency at the QTL is  
245 set then to  $p_0$ , and the mean optimum is shift by  $m_0$  relative to the expected background mean  
246 phenotype. To simulate random genetic drift, the allelic frequency at the QTL in the next generation is  
247 drawn randomly from a binomial distribution with parameters  $N_e$  (the effective population size) and  $p'$   
248 (the expected frequency after selection in the current generation), consistent with a haploid Wright-  
249 Fisher population (Crow and Kimura 1970). Similarly for the mean background, genetic drift was  
250 simulated by drawing the mean phenotype in the next generation from a normal distribution with mean  
251 the expected mean background phenotype after selection, and variance  $G/N_e$  (Lande 1976).

### 252 **Data availability**

253 A Mathematica notebook including code for simulations is available from a FigShare repository.

### 254 **Results**

255 We are interested in fluctuating selection at a gene affecting a quantitative trait (or QTL) exposed to a  
256 randomly moving optimum phenotype. The stochastic population genetics at the QTL will be analyzed  
257 on the logit scale  $\psi = \ln(p/q)$  for mathematical convenience (as in, e.g., Kimura 1954; Gillespie 1991),  
258 and also because this directly relates to empirical measurements (Chevin 2011; Gallet et al. 2012; see

259 also Discussion). From equation (9),  $t$  generations after starting from an initial logit frequency  $\psi_0$ , we  
260 have

$$\psi_t = \psi_0 - \frac{S\alpha}{2} \left[ \alpha t + 2 \sum_{i=0}^{t-1} (m_i - \theta_i) \right]. \quad (13)$$

261 The first term in brackets increases linearly with time, and corresponds to a component of selection that  
262 only depends on the phenotypic effect of the mutation and the strength of selection on the trait, but not  
263 on the background phenotype or the environment. All the influence of the fluctuating environment and  
264 background phenotype arises through the sum (second term in brackets), which shows that the influences  
265 of all past maladaptations (deviations of the mean phenotype from the optimum) weigh equally in their  
266 contribution to population genetics over time. In a stochastic environment, this means that a chance  
267 event causing a large deviation from the optimum can have persistent effects on genetic change. This  
268 occurs here because selection is assumed to be frequency independent; with frequency-dependent  
269 selection, non-linear dynamics could instead rapidly erase memory of past environments and  
270 maladaptation, as occurs for population dynamics with density dependence (Chevin *et al.* 2017).

271 The optimum phenotype is assumed to follow a Gaussian process. In most contexts we will  
272 investigate, this causes the population genetics at the QTL to also follow a Gaussian process on the logit  
273 scale, such that  $\psi$  has a Gaussian distribution at any time. A Gaussian distribution of logit allelic  
274 frequency was also found in phenomenological models without an explicit phenotype, where selection  
275 coefficients were assumed to undergo a Gaussian process (Kimura 1954; Gillespie 1991, p.149). The  
276 reason for this correspondence is that  $\psi$  is linear in phenotypic mismatches with optimum in eq. (13),  
277 and these mismatches themselves follow a Gaussian process (i) in the absence of background polygenic  
278 variation; and (ii) with background polygenic variation, as long as evolution of the mean background is  
279 little affected by the QTL, such that  $m + p'\alpha - \theta \approx m - \theta$ . When these assumptions hold, the  
280 distribution of allelic frequencies in a stochastic environment can be summarized by their mean and  
281 variance on the logit scale,  $E_\psi$  and  $\sigma_\psi^2$ . A simple transformation can then be used to retrieve the  
282 distribution of allelic frequencies, following Gillespie (1991, p.149),

$$f(p) = \frac{1}{pq} \mathcal{N}_{E_\psi, \sigma_\psi^2} \left( \ln \frac{p}{q} \right). \quad (14)$$

283 where  $\mathcal{N}_{E,V}(x)$  is the density of a normal distribution with mean  $E$  and variance  $V$  evaluated at  $x$ . This  
284 transformation is illustrated in **Figure 1**.

### 285 **Non-plastic QTL**

286 We first focus on the situation where the phenotypic effect  $\alpha$  of the mutation at the QTL does not change  
287 in response to the environment. The environment is assumed to undergo a sudden shift at time 0 in  
288 addition to the stochastic fluctuations, such that the expected mean background phenotype initially  
289 deviates from the expected optimum by  $d = E(m_0) - E(\theta)$ , and that a mutation approaching the mean  
290 phenotype from the average optimum is expected to be favored.

291 **Monomorphic background:** It is informative to first investigate the simplest case where the trait does  
 292 not have background polygenic variation. The focal mutation at the QTL then segregates in a population  
 293 that is otherwise monomorphic with respect to adaptation to the fluctuating environment. This context  
 294 belongs to the weak-mutation limit often assumed in molecular evolution, for instance in Gillespie's  
 295 (1983, 1991) SSWM regime, and establishes the most direct connection with results from earlier models  
 296 of fluctuating selection that do not include an explicit phenotype under selection (Wright 1948; Kimura  
 297 1954; Nei 1971; Ohta 1972; Gillespie 1973, 1979, 1991; Nei and Yokoyama 1976; Takahata and Kimura  
 298 1979). With monomorphic background, from eq. (13) the expected logit allelic frequency at time  $t$   
 299 starting from a known frequency  $p_0$  is

$$E_{\psi,t} = \psi_0 - \frac{S\alpha}{2} [\alpha + 2d]t. \quad (15)$$

300 In this context, the expected logit allelic frequency thus increases linearly in time, with a slope given by  
 301 the expected selection coefficient  $E(\Delta\psi) = -\frac{S\alpha}{2} [\alpha + 2d]$ . This selection coefficient is not affected by  
 302 random fluctuations in the optimum, and instead only depends on the constant mismatch  $d$  between the  
 303 background mean phenotype  $m$  and the expected optimum  $E(\theta)$ . The mutation at the QTL is expected  
 304 to spread in the population only if allows approaching the optimum, that is, if  $\alpha^2 + 2\alpha d < 0$ .

305 Even though fluctuations in the optimum do not affect the expected trajectory, they do increase the  
 306 variance of the stochastic population genetic process. The variance of logit allelic frequency at time  $t$ ,  
 307 starting from a known frequency  $p_0$ , is (from eq. 13),

$$\sigma_{\psi,t}^2 = (S\alpha)^2 \left[ \sum_{i=0}^{t-1} \text{var}(\theta_i) + 2 \sum_{i=0}^{t-2} \sum_{j=i+1}^{t-1} \text{cov}(\theta_i, \theta_j) \right]. \quad (16)$$

308 When the optimum undergoes a stationary AR1 process as assumed here, the variance of the population  
 309 genetic process at the QTL becomes

$$\sigma_{\psi,t}^2 = (S\alpha\sigma_\theta)^2 \left[ \frac{1+\rho}{1-\rho} t - \frac{2\rho(1-\rho^t)}{(1-\rho)^2} \right], \quad (17)$$

310 where  $\sigma_\theta^2$  is the stationary variance of random fluctuations in the optimum, and  $\rho$  is their autocorrelation  
 311 over one generation. Note that in this scenario,  $\rho$  is also the per-generation autocorrelation of selection  
 312 coefficients  $s = \Delta\psi$ , while the variance of selection coefficients is  $\text{Var}(\Delta\psi) = (S\alpha\sigma_\theta)^2$ . For large  
 313 times  $t \gg -\frac{1}{\ln\rho}$ , eq. (17) further simplifies as

$$\sigma_{\psi,t}^2 \approx (S\alpha\sigma_\theta)^2 \left[ \frac{1+\rho}{1-\rho} t - \frac{2\rho}{(1-\rho)^2} \right], \quad (18)$$

314 which shows that the variance in logit allelic frequency eventually increases near to linearly with time  
 315 (**Figure 3A**), and converges more rapidly to this linear change under smaller autocorrelation in the  
 316 optimum. Stochastic variance in the optimum increases faster under larger autocorrelation in the  
 317 optimum. **Figure 1** shows that the distribution of  $\psi$  is well predicted by a Gaussian with mean and  
 318 variance given by eqs. (15) and (17). Increasing environmental autocorrelation does not change the

319 expected evolutionary trajectory on the logit scale, but increases its variance (**Figure 1A-B**). When  
 320 transforming to the scale of allelic frequencies, increased environmental autocorrelation causes a  
 321 broadening of the time span over which selective sweeps occur in the population (**Figure 1C-D**).

322 **Polygenic background:** With polygenic variation in the background, the mean background phenotype  
 323 is no longer constant, but instead evolves in response to deterministic and stochastic components of  
 324 environmental change. Away from the unstable equilibrium in eq. (11), the expected evolutionary  
 325 trajectory at the QTL is similar to that investigated without fluctuating selection (Lande 1983; Chevin  
 326 and Hospital 2008). In particular, when the influence of the QTL on evolution of the background trait  
 327 can be neglected, then combining eqs. (6) and (8) the expected mean background phenotype approaches  
 328 the expected optimum geometrically,  $E(m) - E(\theta) = d(1 - SG)^t$  (Lande 1976; Gomulkiewicz and  
 329 Holt 1995). Combining with eq. (13), the expected logit allelic frequency is

$$E_{\psi,t} \approx \psi_0 - \frac{s\alpha}{2} \left( \alpha t + 2d \frac{1-(1-SG)^t}{SG} \right). \quad (19)$$

330 This shows that even when a mutation at the QTL is initially beneficial because it points towards the  
 331 optimum, its dynamics slows down in time as the mean background approaches the optimum (Lande  
 332 1983; Chevin and Hospital 2008). Equation (19) even predicts that an initially beneficial mutation  
 333 eventually becomes deleterious, and starts declining in frequency when the mean background is  
 334 sufficiently close to the optimum that the QTL causes an overshoot of the latter (Lande 1983; Chevin  
 335 and Hospital 2008). This can be seen by noting that in the long run, the term in parenthesis in eq. (19)  
 336 tends towards  $\alpha t + 2d/SG$  and eventually becomes dominated by  $\alpha t$ , leading to an expected dynamics  
 337 that declines linearly with slope  $-S\alpha^2 t/2$ . An initially beneficial mutation starts declining when its  
 338 selection coefficient crosses 0. Applying the weak-effect approximation for evolution of the mean  
 339 background (above eq. 19) to eq. (9), this occurs when  $\alpha + 2d(1 - SG)^t = 0$ , that is, at time

$$t_{max} = \frac{\ln(-\frac{\alpha}{2d})}{\ln(1-SG)}. \quad (20)$$

340 At this point, the expected logit allelic frequency of the mutation at the QTL reaches its maximum,  
 341 which is (combining eqs. 20 and 19)

$$\psi_{max} \approx \psi_0 - \frac{s\alpha}{2} \left( \alpha \frac{\ln(-\frac{\alpha}{2d})}{\ln(1-SG)} + \frac{2d+\alpha}{SG} \right). \quad (21)$$

342 However, this scenario may actually be avoided if the focal mutation reaches  $p > 1/2$  ( $\psi > 0$ ) before  
 343  $t_{max}$ , such that the system gets beyond the unstable equilibrium in eq. (11). The mutation at the QTL  
 344 then sweeps to fixation, and the mean background evolves away from the optimum to compensate for  
 345 the QTL effect (Lande 1983; Chevin and Hospital 2008). We will investigate this scenario in more detail  
 346 below, but let us first turn to the variance of the stochastic process.

347 For the variance of the process, we rely on the weak-effect approximation in eq. (12), whereby  
 348 fluctuating selection on the mean background phenotype is little affected by dynamics at the QTL. More  
 349 broadly speaking, we assume the system is away from the unstable equilibrium in eq. (11). When this

350 holds, we can build upon previous evolutionary quantitative genetics results for the dynamics of the  
 351 mean background phenotype in a fluctuating environment, to derive the dynamics at the QTL. For an  
 352 AR1 process as modeled here, the stationary variance of mismatch of the mean background phenotype  
 353 with the optimum is (Charlesworth 1993)

$$\sigma_{m-\theta}^2 = \frac{2\sigma_{\theta}^2(1-\rho)}{(2-SG)[1-\rho(1-SG)]}, \quad (22)$$

354 and its temporal autocorrelation function over  $\tau$  generations is

$$\rho_{m-\theta}(\tau) = \frac{\rho^{\tau} - \kappa(1-SG)^{\tau}}{1-\kappa}, \quad (23)$$

355 where  $\kappa = SG \frac{(1+\rho)}{2(1-\rho)}$  (Cotto and Chevin 2019; see also continuous-time approximation in Chevin and  
 356 Haller 2014). Combining with eq. (16) leads, after some algebra, to the stochastic variance of logit allelic  
 357 frequency,

$$\sigma_{\psi,t}^2 = 2(S\alpha\sigma_{\theta})^2 \frac{(1-SG)^2 - \rho^2 - (1-\rho^2)(1-SG)^{t+1} + (2-SG)SG\rho^{1+t}}{SG(2-SG)(1-\rho-SG)[1-\rho(1-SG)]}. \quad (24)$$

358 Quite strikingly, contrary to the case of a monomorphic genetic background,  $\sigma_{\psi,t}^2$  does not increase  
 359 indefinitely with polygenic background; instead, its dynamics slows down towards an asymptotic  
 360 maximum,

$$\sigma_{\psi,\infty}^2 = 2(S\alpha\sigma_{\theta})^2 \frac{1+\rho-SG}{(2-SG)SG[1-\rho(1-SG)]}, \quad (25)$$

361 which under weak rate of response to selection in the background  $SG$  can be approximated by

$$\sigma_{\psi,\infty}^2 \approx (S\alpha\sigma_{\theta})^2 \frac{1+\rho}{SG(1-\rho)}. \quad (26)$$

362 In other words, with a polygenic background, the distribution of logit allelic frequency  $\psi$  at the QTL  
 363 tends to a traveling wave, *i.e.* a Gaussian with moving mean but constant variance, as shown in **Figure**  
 364 **2**. This property holds as long as the population is not near the unstable equilibrium in eq. (11), and  
 365 frequencies at the QTL are sufficiently intermediate that drift is not the main source stochasticity  
 366 (below).

367 Inspection of eq. (24) indicates that the rate of approach to the asymptotic variance is determined by  
 368 the smallest of  $(1-SG)$  and  $\rho$ . In realistic parameter ranges, the rate of response to selection in the  
 369 background  $SG$  is small, while  $\rho$  may be well below 1, so the time scale of approach to equilibrium for  
 370  $\sigma_{\psi,t}^2$  should scale in  $(SG)^{-1}$ . This is confirmed by the simulations, which show that  $\sigma_{\psi,t}^2$  converges faster  
 371 to its asymptote under larger background genetic variance, while the rate of convergence is little affected  
 372 by  $\rho$  (**Figure 3**). The asymptotic variance may be well below that in the absence of polygenic  
 373 background variation (compare panel A to B-C in **Figure 3**). As predicted by eqs. (25-26), the  
 374 asymptotic variance  $\sigma_{\psi,\infty}^2$  decreases with increasing genetic variance  $G$  in the background, and increases  
 375 with increasing environmental autocorrelation  $\rho$  (**Figure 3**). The influence of autocorrelation is highly

376 non-linear: in our example  $\sigma_{\psi,\infty}^2$  is approximately doubled from  $\rho = 0.1$  to  $\rho = 0.5$ , but multiplied by  
377 4-5 from  $\rho = 0.5$  to  $\rho = 0.9$  (**Figure 3 B-C**).

378 The variance of the stochastic population genetic process has consequences for the bistability of  
379 genetic architecture, and the likelihood of a complete sweep. In particular, when the expected trajectory  
380 in eq. (19) reaches the vicinity of the unstable equilibrium in eq. (11), the process variance may cause  
381 paths to split on each side of this equilibrium and reach alternative fixed equilibria, with either complete  
382 sweep or loss of the mutation at the QTL (eq. 10). This is illustrated in **Figure 4**. In this example, the  
383 expected trajectory involves a loss of the mutation at the QTL, which occurs for all sample paths shown  
384 in **Figure 4A**. However, increasing environmental autocorrelation causes some trajectories to sweep to  
385 high frequency (**Figure 4B**). This occurs because environmental autocorrelation increases the stochastic  
386 variance of the population genetic process (eqs. 24, 25), and thereby the probability that some  
387 trajectories cross the unstable equilibrium, reaching the basin of attraction of the high-frequency  
388 equilibrium. Based on this rationale, the proportion of trajectories that reach each alternative stable  
389 equilibrium (fixation or loss) may be approximated from the expected proportion of trajectories that are  
390 above and below the unstable equilibrium, based on the predicted Gaussian distribution of  $\psi$  at time  
391  $t_{max}$ , when the expected frequency is predicted to be highest based on the simplified model where the  
392 QTL does not affect evolution of the mean background (eq. 20). **Figure 4C** shows that this approach  
393 correctly predicts how the proportion of sweeps changes with environmental autocorrelation  $\rho$ .  
394 Importantly, since the expected trajectory does not depend on stochastic environmental fluctuations  
395 (neither  $\sigma_{\theta}^2$  nor  $\rho$  appear in eq. 19), all effects of environmental autocorrelation (or variance) on the  
396 probability of a sweep are mediated by the stochastic variance of the process.

### 397 ***QTL for phenotypic plasticity***

398 Let us now turn to the case where the QTL influences not only the phenotype, but also how this  
399 phenotype responds to the environment. Phenotypic plasticity, the phenotypic response of a given  
400 genotype to its environment of development or expression, is a ubiquitous feature across the tree of life  
401 (Schlichting and Pigliucci 1998; West-Eberhard 2003). There is also massive evidence for genetic  
402 variance in plasticity in the form of genotype-by-environment interactions, one of the oldest and most  
403 widespread observations in genetic studies (Falconer 1952; Via and Lande 1985; Scheiner 1993; Gerke  
404 *et al.* 2010; Des Marais *et al.* 2013), with molecular mechanisms that are increasingly understood  
405 (Angers *et al.* 2010; Beldade *et al.* 2011; Ghalambor *et al.* 2015; Gibert *et al.* 2016). For simplicity I  
406 here assume linear reaction norms, where the slope quantifies plasticity. Although this is necessarily a  
407 simplification of reality, it is generally a good description over relevant environmental ranges for  
408 phenological traits, a major class of phenotypic responses to climate change (e.g., Charmantier *et al.*  
409 2008). This also allows comparing our results to the large body of theoretical literature also based on  
410 the assumption of linear reaction norms (Gavrilets and Scheiner 1993b; Scheiner 1998; Lande 2009;  
411 Chevin and Lande 2015; Tufto 2015). Such models likely capture the broad evolutionary effects of

412 plasticity for monotonic reaction norms. More complex monotonic reaction norm shapes can be modeled  
413 to focus on more specific scenarios such as threshold traits with a bounded range of expression (Chevin  
414 and Lande 2013), while non-monotonic reaction norms with an optimum are more appropriate for fitness  
415 or performance traits (Lynch and Gabriel 1987; Huey and Kingsolver 1989), which are not the focus  
416 here. I also assume for simplicity that the background has constant plasticity, such that all genetic  
417 variance in plasticity comes from the major gene. A final assumption in this section will be to focus on  
418 stationary environmental fluctuations with no major shift ( $d = 0$ ). Such purely stationary fluctuations  
419 are expected to counter-select any mutation at the major gene in the absence of plasticity (eqs. 15 and  
420 19), so it is a good benchmark on which to assess selection on a plasticity QTL.

421 **Monomorphic background:** In the low mutation limit where the background mean phenotype does  
422 not evolve while the mutation is segregating at the QTL, but has still evolved on a longer time scale to  
423 match the expected optimum at the onset of selection at the QTL, the expected logit allelic frequency  
424 increases linearly in time as in eq. (15), with expected selection coefficient (Appendix)

$$E(\Delta\psi) = -\frac{S}{2}\{a_\alpha^2 + b_\alpha[(b_\alpha - 2(b_\theta - b_m)]\sigma_\varepsilon^2\}. \quad (27)$$

425 The first term in curly brackets is a component of selection that does not depend on the pattern of  
426 environmental fluctuations, and is similar to the expected selection coefficient without plasticity (15)  
427 and without a major environmental shift. This component reduces the expected selection coefficient, as  
428 it increases the mismatch with the expected optimum phenotype. The second term is a component of  
429 selection caused by the effect of the QTL on phenotypic plasticity. This term shows that the plastic effect  
430  $b_\alpha$  of the mutation at the QTL is favored by selection if it allows approaching the optimal response to  
431 the environment of development  $b_\theta$ , that is if  $b_\alpha[(b_\alpha - 2(b_\theta - b_m)] < 0$ . The expected selection  
432 coefficient is maximum for  $\widehat{b_\alpha} = b_\theta - b_m$ , regardless of  $a_\alpha$ . Importantly, whereas the expected  
433 selection coefficient on a non-plastic mutation does not depend on the variance of fluctuations (eq. 15),  
434 the component of the expected selection coefficient caused by plasticity is stronger under larger variance  
435  $\sigma_\varepsilon^2$  of the environment of development, and thus depends on fluctuations in the optimum (from eq. 4).  
436 This reflects the fact that, in a stationary environment, selection on phenotypic plasticity stems from its  
437 effect on the variance of phenotypic mismatch with the optimum, rather than on the average mismatch  
438 (Lande 2009; Ashander *et al.* 2016). As the variance of the environment of development  $\sigma_\varepsilon^2$  increases,  
439 a mutation with a given beneficial effect on phenotypic plasticity becomes increasingly likely to spread  
440 even if it causes a systematic mismatch with the optimum in the mean environment, with a deleterious  
441 side-effect  $-\frac{S}{2}a_\alpha^2$ . In the absence of background genetic variation, the expected selection at the plasticity  
442 QTL does not depend directly on autocorrelation in the environment, but only on the dependence of the  
443 optimum on the environment of development, through the parameter  $b_\theta$ . Note however that if  
444 phenotypic development/expression and movements of the optimum respond to the same environmental

445 variable (e.g. temperature), but at different times in a generation, then  $b_\theta$  is directly related to the  
 446 autocorrelation  $\rho$  of the optimum (Lande 2009; Michel *et al.* 2014).

447 The variance of selection coefficients with plasticity but no background genetic variation is

$$\text{Var}(\Delta\psi) = \frac{S^2}{2} (2\sigma_\xi^2 a_\alpha^2 + b_\alpha^2 [b_\alpha + 2(b_m - b_\theta)]^2 \sigma_\varepsilon^4 + 2[a_\alpha^2 (b_\alpha + b_m - b_\theta)^2 + \sigma_\xi^2 b_\alpha^2] \sigma_\varepsilon^2). \quad (28)$$

448 Equation (28) implies that mutations that have the same expected selection coefficient, because they  
 449 cause the same deviation from the optimal plasticity  $\widehat{b}_\alpha$ , can have different variances in allelic frequency  
 450 change. This is illustrated in **Figure 5**, which shows that a mutation that leads to hyper-optimal plasticity  
 451 has more stochastic variance than a mutation that cause equally sub-optimal plasticity, because the  
 452 former causes overshoots of the optimum while the latter causes undershoots. This difference in  
 453 stochastic variance between mutations with the same expected selection coefficient, which should  
 454 impact their relative probabilities of quasi-fixation (Kimura 1954), is stronger for larger deviation from  
 455 the optimal plasticity (**Figure 5B**).

456 **Polygenic background:** When the mean background phenotype also evolves via polygenic variation,  
 457 the expected dynamics at the QTL are modified in two main ways. First, background genetic variance  
 458 contributes to adaptive tracking of the mean phenotype via genetic evolution, thus reducing the benefit  
 459 of phenotypic plasticity, as in pure quantitative genetic models (Tufto 2015). The level of plasticity that  
 460 maximizes the expected selection coefficient then becomes (Appendix)

$$\widehat{b}_\alpha \approx b_\theta - b_m - \frac{SG(b_\theta - b_m)}{SG - \ln(\rho)} \quad (29)$$

461 where the last term is the regression slope of the background mean reaction norm intercept on the  
 462 environment of development, caused by evolution of the mean background in response to the fluctuating  
 463 environment. **Figure 6A** illustrates how selection via the QTL effect on plasticity is reduced by adaptive  
 464 tracking of the optimum by evolution of the mean background.

465 Second, when the benefit of plasticity allows the mutation at the QTL to spread despite a pleiotropic  
 466 effect  $a_\alpha$  on the intercept of the reaction norm, the expected mean background phenotype can evolve  
 467 away from the optimum in the average environment to compensate for the associated cost, that is, it  
 468 evolves to  $a_m = a_\alpha$  (**Figure 6D**). Intriguingly, after this has occurred the mutation at the QTL becomes  
 469 more strongly selected than if it did not have a pleiotropic effect on the reaction norm intercept (**Figure**  
 470 **6B**). This occurs because the QTL effect on reaction norm intercept now allows compensating for  
 471 maladaptation in the background, which adds a positive component  $Sa_\alpha^2/2$  to the benefit *via* the QTL  
 472 effect on phenotypic plasticity. In other words, what initially caused a displacement from the mean  
 473 optimum allows approaching the mean optimum after the mean background has been displaced.  
 474 Furthermore, the spread of the mutation at the plasticity QTL reduces the effective magnitude of  
 475 fluctuating selection on background mean reaction norm intercept, resulting in smaller evolutionary  
 476 fluctuations in the background (**Figure 6C, D**).



## 477 **Drift versus fluctuating selection**

478 All the analytical results above neglect the influence of random genetic drift, and simulations were run  
 479 under large  $N_e$  to single out the influence of fluctuating selection as a source of stochasticity. However,  
 480 it is useful to delineate more precisely the conditions under which drift can be neglected relative to  
 481 environmental stochasticity. The overall variance in allelic frequency change, accounting for both  
 482 fluctuating selection and random genetic drift in a Wright-Fisher population, can be obtained from the  
 483 law of total variance, and was previously shown (Ohta 1972) to be

$$V(\Delta p) = pq \left( \frac{1}{N_e} + V_s pq \right), \quad (30)$$

484 where  $V_s = V(\Delta\psi)$  is the variance of selection coefficients caused by fluctuating selection. From this it  
 485 entails that fluctuation selection dominates drift as a source of stochasticity when  $V_s pq > \frac{1}{N_e}$ , that is for

$$\left\{ \begin{array}{l} N_e V_s > 4 \\ p \in \left[ \frac{1}{2} - \sqrt{\frac{N_e V_s - 4}{4 N_e V_s}}, \frac{1}{2} + \sqrt{\frac{N_e V_s - 4}{4 N_e V_s}} \right] \end{array} \right. \quad (31)$$

486 This can be translated into a condition for the logit allelic frequency  $\psi$ ,

$$\left\{ \begin{array}{l} N_e V_s > 4 \\ |\psi| < \ln \left( \frac{1 + \sqrt{\frac{N_e V_s - 4}{N_e V_s}}}{1 - \sqrt{\frac{N_e V_s - 4}{N_e V_s}}} \right) \end{array} \right. \quad (32)$$

487 Very similar results are obtained (not shown) if the criterion is based on the stochastic variance of  $\psi$ ,  
 488 for which the fluctuating selection component is independent of  $\psi$  (as derived in the main text), but the  
 489 drift component is not. Equation (32) shows that an absolute condition for fluctuating selection to be the  
 490 dominant source of stochasticity is  $N_e V_s > 4$ . When this holds, fluctuating selection dominates over a  
 491 range of intermediate allelic frequencies, while drift dominates at extreme frequencies outside of this  
 492 range. The bounds of this range are entirely determined by the compound parameter  $N_e V_s$ , as shown by  
 493 eqs. (31-32) and **Figure 7A**. **Figure 7** further illustrates that for small  $N_e V_s$ , small initial frequencies  
 494 and/or large final frequencies result in inflated variance relative to the expectation under pure fluctuating  
 495 selection (panels B-C), as well as fixation events by drift (panel B). As  $N_e V_s$  increases from panel B to  
 496 D, the predictions under pure fluctuating selection become increasingly accurate, all the more so as the  
 497 initial allelic frequency is within the range defined by eq. (32).

## 498 **Discussion**

499 Analysis of a simple model combining population and quantitative genetics has revealed a number of  
 500 interesting properties about fluctuating selection at a gene affecting a quantitative trait (or QTL), when  
 501 this trait undergoes randomly fluctuating selection caused by a moving optimum phenotype. The first  
 502 important observation is that, when assessed on the logit scale - a natural scale for allelic frequencies

503 (Kimura 1954; Gillespie 1991; Chevin 2011; Gallet *et al.* 2012) -, the dynamics at the QTL has a simple  
504 connection to movements of the optimum, since the selection coefficient depends linearly on the  
505 mismatch between the mean background phenotype and the optimum (eq. 9; see also Martin and  
506 Lenormand 2006). For a QTL that has the same phenotypic effect in all environments (no phenotypic  
507 plasticity), the expected trajectory only depends on the expected phenotypic mismatch with the  
508 optimum, not on the pattern of fluctuations in this optimum. However the variance of trajectories, an  
509 important determinant of probabilities of quasi-fixation (Kimura 1954), is strongly affected not only by  
510 the magnitude of fluctuations in the optimum, but also by their autocorrelation (eq. 17, **Figure 1**). When  
511 the focal QTL is the only polymorphic gene undergoing fluctuating selection, this stochastic variance  
512 increases linearly over time (**Figure 3A**), at a rate that is faster under larger positive autocorrelation in  
513 the optimum. In contrast, when polygenic variation elsewhere in the genome allows for evolution of the  
514 mean background phenotype, stochastic variance at the QTL is bounded by a maximum asymptotic  
515 value, which is lower under higher genetic variance in the background (eqs. 24-25 and **Figure 3 B-C**).  
516 This stochastic variance caused by fluctuating selection interacts with the inherent bi-stability of genetic  
517 architecture in this system (Lande 1983; Chevin and Hospital 2008), and may increase the probability  
518 that the mutation at the QTL reaches fixation at the expense of the background mean phenotype (as  
519 illustrated in **Figure 4**), or the reverse.

520 When the mutation at the QTL also affects phenotypic plasticity via the slope of a linear reaction  
521 norm, then even its *expected* trajectory depends on the pattern of fluctuations, with stronger selection  
522 under large fluctuations (eq. 27), contrary to the case of a non-plastic QTL. Interestingly, mutations with  
523 the same expected selection coefficient - because they cause the same deviation from the optimal  
524 plasticity - may have very different variances in allelic trajectories, depending on whether they tend to  
525 cause overshoots or undershoots of the fluctuating optimum (**Figure 5**). Finally, a mutation that is  
526 sufficiently strongly selected via its effect on phenotypic plasticity can spread despite causing a  
527 systematic mismatch with the optimum in the average environment. When the mean background  
528 phenotype can evolve by polygenic variation, it can compensate for this pleiotropic effect on reaction  
529 norm intercept. Quite strikingly, this increases selection at the plasticity QTL, causing the mutation to  
530 spread faster than if it only affected plasticity (**Figure 6B**).

531 Consistent with previous uses of this model with a major gene and polygenes (Lande 1983; Agrawal  
532 *et al.* 2001; Chevin and Hospital 2008; Gomulkiewicz *et al.* 2010), I did not model explicitly the  
533 maintenance of genetic variance in the background, instead assuming that it had reached an equilibrium  
534 between mutation and stabilizing/fluctuating selection. This has provided simple and robust analytical  
535 insights about the interplay of selection at a major gene with background polygenic variation. Although  
536 environmental fluctuations should affect the expected additive genetic variance  $G$  to some extent  
537 (Burger and Gimelfarb 2004; Svardal *et al.* 2011), this does not necessarily affect our results because  
538 they are conditioned on  $G$ , rather than on mutational variance for instance, which is less directly  
539 amenable to empirical measurement. More critical is the fact that the background additive genetic

540 variance should itself fluctuate in time as alleles in the background change in frequency, especially in a  
541 finite population (Bürger and Lande 1994; Höllinger *et al.* 2019). This should increase temporal  
542 variation in the evolutionary process, so that results about stochastic variance here may be considered  
543 as lower bounds, if the long-term mean  $G$  is used in formula. Modeling explicitly the dynamics of  
544 background quantitative genetic variance in a random environment would require using individual-  
545 based simulations, as done for instance by Bürger and Gimelfarb (2002). Previous work based on a  
546 similar environmental context as modeled here proved that most results are little affected in regimes  
547 where substantial genetic variation can be maintained for a quantitative trait (Chevin and Haller 2014;  
548 Chevin *et al.* 2017), as assumed here.

549 Although the simulations included random genetic drift, all the analytical results were derived by  
550 neglecting the influence of drift. These analytical results are therefore valid over a range of allelic  
551 frequencies that is entirely determined by the product of the effective size by the variance of selection  
552 coefficients, as shown in eqs. (31-32) and **Figure 7**. In most simulations, I have assumed that the  
553 mutation at the QTL is initially at low frequency, but still common enough to be within the range defined  
554 by eqs. (31-32), where frequency change is entirely driven by selection. It would be worthwhile  
555 investigating in future work the probability of establishment of a mutation that starts in one copy and  
556 affects a trait exposed to randomly fluctuating selection, but this requires developments that are beyond  
557 the scope of the present study. For our purpose, we can consider that the initial frequency  $p_0$  stems either  
558 from the trajectory of a newly arisen mutation conditional on non-extinction, which is expected to  
559 rapidly rise away from 0 (Barton 1998; Martin and Lambert 2015), or from a distribution at mutation-  
560 selection drift equilibrium (Wright 1937; Barton 1989; Höllinger *et al.* 2019).

561 Our analytical results about the distribution of logit allelic frequency lend themselves well to  
562 comparisons with empirical measurements. Indeed the logit of allelic frequencies is readily obtained  
563 from number of copies of each type, since  $\psi = \ln\left(\frac{p}{q}\right) = \ln N_m - \ln N_w$ , where  $N_m$  and  $N_w$  are the copy  
564 numbers of the mutant (derived) and wild-type (ancestral) allele, respectively. In fact, when frequencies  
565 are estimated on a subsample from the population, the strength of selection on genotypes is generally  
566 estimated using logistic regression (Gallet *et al.* 2012), a generalized linear (mixed) model that uses the  
567 logit as link function. Our theoretical predictions therefore apply directly to the linear predictor of such  
568 a GLMM, without requiring any transformation. For instance if we consider an experiment where  
569 multiple lines undergo independent times series of a stochastic environment (*i.e.*, different paths of the  
570 same process), the stochastic variance among replicates can be estimated as a random effect in a logistic  
571 GLMM. If multiple loci are available, this random effect should strongly covary among loci within an  
572 environmental time series, because they share the same history of environments, in contrast to frequency  
573 changes caused by drift, which should only be similar between tightly linked loci.

574 The results here are based on a model of fluctuating optimum for a quantitative trait, similar to  
575 previous theory by Connallon and Clark (2015), but extend this theory by allowing for environmental

576 autocorrelation, and by deriving the stochastic variance of the population genetic process. Importantly,  
577 most of the present results should also be relevant to cases where an explicit phenotype under selection  
578 is not identified or measured, but the relationship between fitness and the environment has the form of  
579 a function with an optimum, which can be approximated as Gaussian (Lynch and Gabriel 1987; Gabriel  
580 and Lynch 1992; Gilchrist 1995). For many organisms, especially microbes, measuring individual  
581 phenotypes can be challenging, and it may prove difficult to identify most traits involved in adaptation  
582 to a particular type of environmental change (ie temperature, salinity...). A common solution is to  
583 directly measure fitness or its life-history components (survival, fecundity) across environments, to  
584 produce an environmental tolerance curve (Deutsch *et al.* 2008; Thomas *et al.* 2012; Foray *et al.* 2014).  
585 An influence of the history of previous environments on these tolerance curves can also be included, via  
586 plasticity-mediated acclimation effects (Calosi *et al.* 2008; Gunderson and Stillman 2015; Nogu e *et al.*  
587 2016). It has been highlighted previously that tolerance curves can be thought of as emerging from a  
588 moving optimum phenotype on unmeasured, possibly plastic, underlying traits (Chevin *et al.* 2010;  
589 Lande 2014), so that a simple re-parameterization can translate all the results above in terms of evolution  
590 of tolerance breadth and environmental optimum. Such a connection has recently been invoked to  
591 analyze population dynamics in a stochastic environment (Chevin *et al.* 2017; Rescan *et al.* 2019),  
592 suggesting that results from the current study are not restricted to cases where relevant quantitative traits  
593 under fluctuating selection can be measured, but may instead apply to a broad range of organisms  
594 exposed to randomly changing environments.

## 595 **Acknowledgements**

596 This work was supported by the European Research Council (Grant 678140-FluctEvol). I thank J.  
597 Hermisson and three anonymous reviewers for useful criticisms and suggestions.

## 598 **Literature cited**

- 599 Agrawal A. F., E. D. Brodie, and L. H. Rieseberg, 2001 Possible consequences of genes of major effect:  
600 transient changes in the G-matrix. *Genetica* 112: 33–43.
- 601 Angers B., E. Castonguay, and R. Massicotte, 2010 Environmentally induced phenotypes and DNA  
602 methylation: How to deal with unpredictable conditions until the next generation and after. *Mol.*  
603 *Ecol.*
- 604 Ashander J., L.-M. Chevin, and M. L. Baskett, 2016 Predicting evolutionary rescue via evolving  
605 plasticity in stochastic environments. *Proc. R. Soc. B Biol. Sci.* 283.
- 606 Barrett R. D. H., and D. Schluter, 2008 Adaptation from standing genetic variation. *Trends Ecol. Evol.*
- 607 Barton N., 1989 The Divergence of a Polygenic System Subject to Stabilizing Selection, Mutation and  
608 Drift. *Genet. Res.* 54: 59–77.
- 609 Barton N. H., 1998 The effect of hitch-hiking on neutral genealogies. *Genet. Res. Cambridge* 72: 123–

- 610 33.
- 611 Barton N. H., 2001 The role of hybridization in evolution. *Mol. Ecol.* 10: 551–568.
- 612 Beldade P., A. R. Mateus, and R. A. Keller, 2011 Evolution and molecular mechanisms of adaptive  
613 developmental plasticity. *Mol Ecol* 20: 1347–1363.
- 614 Bell G., 2010 Fluctuating selection: the perpetual renewal of adaptation in variable environments.  
615 *Philos. Trans. R. Soc. B-Biological Sci.* 365: 87–97.
- 616 Berg J. J., and G. Coop, 2014 A Population Genetic Signal of Polygenic Adaptation. *PLoS Genet.*
- 617 Bergland A. O., E. L. Behrman, K. R. O’Brien, P. S. Schmidt, and D. A. Petrov, 2014 Genomic Evidence  
618 of Rapid and Stable Adaptive Oscillations over Seasonal Time Scales in *Drosophila*. *PLoS Genet.*
- 619 Bull J. J., 1987 Evolution of Phenotypic Variance. *Evolution (N. Y.)*. 41: 303–315.
- 620 Burger R., and A. Gimelfarb, 2004 The effects of intraspecific competition and stabilizing selection on  
621 a polygenic trait. *Genetics* 167: 1425–1443.
- 622 Bürger R., and R. Lande, 1994 On the Distribution of the Mean and Variance of a Quantitative Trait  
623 under Mutation-Selection-Drift Balance. *Genetics* 138: 901–912.
- 624 Bürger R., and A. Gimelfarb, 2002 Fluctuating environments and the role of mutation in maintaining  
625 quantitative genetic variation. *Genet. Res.* 80: 31–46.
- 626 Calosi P., D. T. Bilton, and J. I. Spicer, 2008 Thermal tolerance, acclimatory capacity and vulnerability  
627 to global climate change. *Biol Lett* 4: 99–102.
- 628 Charlesworth B., 1993 Directional selection and the evolution of sex and recombination. *Genet. Res.*  
629 61: 205–224.
- 630 Charmantier A., R. H. McCleery, L. R. Cole, C. Perrins, L. E. Kruuk, *et al.*, 2008 Adaptive phenotypic  
631 plasticity in response to climate change in a wild bird population. *Science (80-. )*. 320: 800–803.
- 632 Chevin L.-M., and F. Hospital, 2008 Selective sweep at a quantitative trait locus in the presence of  
633 background genetic variation. *Genetics* 180: 1645–60.
- 634 Chevin L.-M., R. Lande, and G. M. Mace, 2010 Adaptation, plasticity, and extinction in a changing  
635 environment: Towards a predictive theory. *PLoS Biol.* 8.
- 636 Chevin L.-M., 2011 On measuring selection in experimental evolution. *Biol. Lett.* 7: 210–213.
- 637 Chevin L.-M., 2013 Genetic constraints on adaptation to a changing environment. *Evolution (N. Y.)*. 67.
- 638 Chevin L.-M., and R. Lande, 2013 Evolution of discrete phenotypes from continuous norms of reaction.  
639 *Am. Nat.* 182.
- 640 Chevin L.-M., and B. C. Haller, 2014 The temporal distribution of directional gradients under selection  
641 for an optimum. *Evolution (N. Y.)*. 68.
- 642 Chevin L.-M., and R. Lande, 2015 Evolution of environmental cues for phenotypic plasticity. *Evolution*  
643 (N. Y.). 69.
- 644 Chevin L.-M., M. E. Visser, and J. Tufto, 2015 Estimating the variation, autocorrelation, and  
645 environmental sensitivity of phenotypic selection. *Evolution (N. Y.)*. 69: 2319–2332.
- 646 Chevin L.-M., O. Cotto, and J. Ashander, 2017 Stochastic Evolutionary Demography under a

- 647 Fluctuating Optimum Phenotype. *Am. Nat.* 190: 786–802.
- 648 Connallon T., and A. G. Clark, 2015 The distribution of fitness effects in an uncertain world. *Evolution*  
649 (N. Y). 69: 1610–1618.
- 650 Cotto O., and L.-M. Chevin, 2019 FLUCTUATIONS IN LIFETIME SELECTION IN AN  
651 AUTOCORRELATED ENVIRONMENT. *J. Evol. Biol.* submitted.
- 652 Crow J. F., and M. Kimura, 1970 *An Introduction to Population Genetics Theory*. Harper and Row, New  
653 York.
- 654 Deutsch C. A., J. J. Tewksbury, R. B. Huey, K. S. Sheldon, C. K. Ghalambor, *et al.*, 2008 Impacts of  
655 climate warming on terrestrial ectotherms across latitude. *Proc Natl Acad Sci U S A* 105: 6668–  
656 6672.
- 657 Engen S., B. E. Saether, T. Kvalnes, and H. Jensen, 2012 Estimating fluctuating selection in age-  
658 structured populations. *J. Evol. Biol.* 25: 1487–1499.
- 659 Falconer D. S., 1952 The problem of environment and selection. *Am. Nat.* 293–298.
- 660 Falconer D. S., and T. F. MacKay, 1996 *Introduction to quantitative genetics*. Longman Group, Harlow,  
661 UK.
- 662 Fisher R. A., 1918 The correlation between relatives on the supposition of Mendelian inheritance. *Trans.*  
663 *R. Soc. Edinburgh* 52: 35–42.
- 664 Fisher R. A., and E. B. Ford, 1947 The spread of a gene in natural conditions in a colony of the moth  
665 *Panaxia dominula*. *Heredity (Edinb)*. 1: 143–174.
- 666 Foray V., E. Desouhant, and P. Gibert, 2014 The impact of thermal fluctuations on reaction norms in  
667 specialist and generalist parasitic wasps. *Funct. Ecol.*
- 668 Gabriel W., and M. Lynch, 1992 The selective advantage of reaction norms for environmental tolerance.  
669 *J. Evol. Biol.* 5: 41–59.
- 670 Gallet R., T. F. Cooper, S. F. Elena, and T. Lenormand, 2012 Measuring Selection Coefficients Below  
671 10<sup>-3</sup>: Method, Questions and Prospects. *Genetics* 190: 175–186.
- 672 Gamelon M., J. Tufto, A. L. K. Nilsson, K. Jerstad, O. W. Røstad, *et al.*, 2018 Environmental drivers of  
673 varying selective optima in a small passerine: A multivariate, multiepisodic approach. *Evolution*  
674 (N. Y).
- 675 Garud N. R., P. W. Messer, E. O. Buzbas, and D. A. Petrov, 2015 Recent Selective Sweeps in North  
676 American *Drosophila melanogaster* Show Signatures of Soft Sweeps. *PLoS Genet.*
- 677 Gavrillets S., and S. M. Scheiner, 1993a The genetics of phenotypic plasticity. 5. Evolution of reaction  
678 norm shape. *J. Evol. Biol.* 6: 31–48.
- 679 Gavrillets S., and S. M. Scheiner, 1993b The Genetics of Phenotypic Plasticity .6. Theoretical Predictions  
680 for Directional Selection. *J. Evol. Biol.* 6: 49–68.
- 681 Gerke J., K. Lorenz, S. Ramnarine, and B. Cohen, 2010 Gene-environment interactions at nucleotide  
682 resolution. *PLoS Genet.*
- 683 Ghalambor C. K., K. L. Hoke, E. W. Ruell, E. K. Fischer, D. N. Reznick, *et al.*, 2015 Non-adaptive

- 684 plasticity potentiates rapid adaptive evolution of gene expression in nature. *Nature*.
- 685 Gibert J. M., E. Mouchel-Vielh, S. De Castro, and F. Peronnet, 2016 Phenotypic Plasticity through  
686 Transcriptional Regulation of the Evolutionary Hotspot Gene *tan* in *Drosophila melanogaster*.  
687 *PLoS Genet*.
- 688 Gilchrist G. W., 1995 Specialists and generalists in changing environments .1. Fitness landscapes of  
689 thermal sensitivity. *Am. Nat.* 146: 252–270.
- 690 Gillespie J. H., 1973 Natural selection with varying selection coefficients – a haploid model. *Genet. Res.*  
691 21: 115.
- 692 Gillespie J. H., 1977 Sampling theory for alleles in a random environment. *Nature*.
- 693 Gillespie J. H., 1979 MOLECULAR EVOLUTION AND POLYMORPHISM IN A RANDOM  
694 ENVIRONMENT. *Genetics* 93.
- 695 Gillespie J. H., 1983 A simple stochastic gene substitution model. *Theor Popul Biol* 23: 202–215.
- 696 Gillespie J. H., 1991 *The causes of molecular evolution*. Oxford University Press, Oxford, UK.
- 697 Gomulkiewicz R., and R. D. Holt, 1995 When Does Evolution by Natural Selection Prevent Extinction.  
698 *Evolution* (N. Y). 49: 201–207.
- 699 Gomulkiewicz R., R. D. Holt, M. Barfield, and S. L. Nuismer, 2010 Genetics, adaptation, and invasion  
700 in harsh environments. *Evol. Appl.* 3: 97–108.
- 701 Grant P. R., and B. R. Grant, 2002 Unpredictable evolution in a 30-year study of Darwin’s finches.  
702 *Science* (80-. ). 296: 707–711.
- 703 Gunderson A. R., and J. H. Stillman, 2015 Plasticity in thermal tolerance has limited potential to buffer  
704 ectotherms from global warming. *Proc. R. Soc. B Biol. Sci.*
- 705 Halley J. M., 1996 Ecology, evolution and 1f-noise. *Trends Ecol. Evol.* 11: 33–37.
- 706 Hermisson J., and P. S. Pennings, 2005 Soft sweeps: molecular population genetics of adaptation from  
707 standing genetic variation. *Genetics* 169: 2335–2352.
- 708 Hermisson J., and P. S. Pennings, 2017 Soft sweeps and beyond: understanding the patterns and  
709 probabilities of selection footprints under rapid adaptation. *Methods Ecol. Evol.*
- 710 Höllinger I., P. S. Pennings, and J. Hermisson, 2019 Polygenic adaptation: From sweeps to subtle  
711 frequency shifts, (J. C. Fay, Ed.). *PLOS Genet.* 15: e1008035.
- 712 Huey R. B., and J. G. Kingsolver, 1989 Evolution of Thermal Sensitivity of Ectotherm Performance.  
713 *Trends Ecol. Evol.* 4: 131–135.
- 714 Jain K., and W. Stephan, 2017 Rapid adaptation of a polygenic trait after a sudden environmental shift.  
715 *Genetics*.
- 716 Jensen J. D., 2014 On the unfounded enthusiasm for soft selective sweeps. *Nat. Commun.* 5.
- 717 Jong G. de, 1990 Quantitative genetics of reaction norms. *J. Evol. Biol.* 3: 447–468.
- 718 Josephs E. B., J. J. Berg, J. Ross-Ibarra, and G. Coop, 2019 Detecting adaptive differentiation in  
719 structured populations with genomic data and common gardens. *Genetics*.
- 720 Kimura M., 1954 Process Leading to Quasi-Fixation of Genes in Natural Populations Due to Random

- 721 Fluctuation of Selection Intensities. *Genetics* 39: 280–95.
- 722 Kimura M., 1968 Evolutionary rate at the molecular level. *Nature* 217: 624–626.
- 723 Kopp M., and J. Hermisson, 2007 Adaptation of a quantitative trait to a moving optimum. *Genetics* 176:  
724 715–719.
- 725 Kopp M., and J. Hermisson, 2009 The genetic basis of phenotypic adaptation I: fixation of beneficial  
726 mutations in the moving optimum model. *Genetics* 182: 233–249.
- 727 Kopp M., and S. Matuszewski, 2014 Rapid evolution of quantitative traits: theoretical perspectives.  
728 *Evol. Appl.* 7: 169–191.
- 729 Lande R., 1976 Natural selection and random genetic drift in phenotypic evolution. *Evolution* (N. Y).  
730 30: 314–334.
- 731 Lande R., 1983 The Response to Selection on Major and Minor Mutations Affecting a Metrical Trait.  
732 *Heredity* (Edinb). 50: 47–65.
- 733 Lande R., and S. Shannon, 1996 The role of genetic variation in adaptation and population persistence  
734 in a changing environment. *Evolution* (N. Y). 50: 434–437.
- 735 Lande R., S. Engen, and B.-E. Saether, 2003 *Stochastic population dynamics in ecology and*  
736 *conservation: an introduction*. Oxford University Press, Oxford, UK.
- 737 Lande R., 2007 Expected relative fitness and the adaptive topography of fluctuating selection. *Evolution*  
738 (N. Y). 61: 1835–1846.
- 739 Lande R., 2009 Adaptation to an extraordinary environment by evolution of phenotypic plasticity and  
740 genetic assimilation. *J. Evol. Biol.* 22: 1435–1446.
- 741 Lande R., S. Engen, and B.-E. Sæther, 2009 An evolutionary maximum principle for density-dependent  
742 population dynamics in a fluctuating environment. *Philos. Trans. R. Soc. B* 364: 1511–1518.
- 743 Lande R., 2014 Evolution of phenotypic plasticity and environmental tolerance of a labile quantitative  
744 character in a fluctuating environment. *J. Evol. Biol.* 27: 866–875.
- 745 Lynch M., 1987 The Consequences of Fluctuating Selection for Isozyme Polymorphisms in *Daphnia*.  
746 *Genetics* 115.
- 747 Lynch M., and W. Gabriel, 1987 Environmental tolerance. *Am. Nat.* 129: 283–303.
- 748 Lynch M., and B. Walsh, 1998 *Genetics and analysis of quantitative traits*. Sinauer Associates. ,  
749 Sunderland, MA, USA.
- 750 MacColl A. D., 2011 The ecological causes of evolution. *Trends Ecol. Evol.* 26: 514–522.
- 751 Marais D. L. Des, K. M. Hernandez, and T. E. Juenger, 2013 Genotype-by-Environment Interaction and  
752 Plasticity: Exploring Genomic Responses of Plants to the Abiotic Environment. *Annu. Rev. Ecol.*  
753 *Evol. Syst.*
- 754 Martin G., and T. Lenormand, 2006 A general multivariate extension of Fisher’s geometrical model and  
755 the distribution of mutation fitness effects across species. *Evolution* (N. Y). 60: 893–907.
- 756 Martin G., and A. Lambert, 2015 A simple, semi-deterministic approximation to the distribution of  
757 selective sweeps in large populations. *Theor. Popul. Biol.*



- 758 Matuszewski S., J. Hermisson, and M. Kopp, 2015 Catch me if you can: Adaptation from standing  
759 genetic variation to a moving phenotypic optimum. *Genetics* 200: 1255–1274.
- 760 Maynard-Smith J., and J. Haigh, 1974 The hitch-hiking effect of a favourable gene. *Genet. Res.*  
761 *Cambridge* 23: 23–35.
- 762 Michel M. J., L.-M. Chevin, and J. H. Knouft, 2014 Evolution of phenotype-environment associations  
763 by genetic responses to selection and phenotypic plasticity in a temporally autocorrelated  
764 environment. *Evolution (N. Y.)*. 68.
- 765 Miura S., Z. Zhang, and M. Nei, 2013 Random fluctuation of selection coefficients and the extent of  
766 nucleotide variation in human populations. *Proc. Natl. Acad. Sci.* 110: 10676–10681.
- 767 Mustonen V., and M. Lassig, 2007 Adaptations to fluctuating selection in *Drosophila*. *Proc Natl Acad*  
768 *Sci U S A* 104: 2277–2282.
- 769 Mustonen V., and M. Lassig, 2010 Fitness flux and ubiquity of adaptive evolution. *Proc Natl Acad Sci*  
770 *U S A* 107: 4248–4253.
- 771 Nei M., 1971 FERTILITY EXCESS NECESSARY FOR GENE SUBSTITUTION IN REGULATED  
772 POPULATIONS. *Genetics* 68.
- 773 Nei M., and S. Yokoyama, 1976 EFFECTS OF RANDOM FLUCTUATION OF SELECTION  
774 INTENSITY ON GENETIC VARIABILITY IN A FINITE POPULATION. *Japanese J. Genet.*
- 775 Nosil P., R. Villoutreix, C. F. de Carvalho, T. E. Farkas, V. Soria-Carrasco, *et al.*, 2018 Natural selection  
776 and the predictability of evolution in *Timema* stick insects. *Science (80-. )*. 359: 765–770.
- 777 Nougé O., N. Svendsen, R. Jabbour-Zahab, T. Lenormand, and L. M. Chevin, 2016 The ontogeny of  
778 tolerance curves: Habitat quality versus acclimation in a stressful environment. *J. Anim. Ecol.*
- 779 Ohta T., 1972 Fixation probability of a mutant influenced by random fluctuation of selection intensity\*.  
780 *Genet. Res., Camb* 19: 33–38.
- 781 Ovaskainen O., and B. Meerson, 2010 Stochastic models of population extinction. *Trends Ecol. Evol.*
- 782 Pavlidis P., S. Hutter, and W. Stephan, 2008 A population genomic approach to map recent positive  
783 selection in model species. *Mol Ecol.*
- 784 Pritchard J. K., J. K. Pickrell, and G. Coop, 2010 The genetics of human adaptation: hard sweeps, soft  
785 sweeps, and polygenic adaptation. *Curr. Biol.* 20: R208–R215.
- 786 Przeworski M., G. Coop, and J. D. Wall, 2005 The signature of positive selection on standing genetic  
787 variation. *Evol. Int J Org Evol.* 59: 2312–2323.
- 788 Racimo F., J. J. Berg, and J. K. Pickrell, 2018 Detecting Polygenic Adaptation in Admixture Graphs.  
789 *Genetics*.
- 790 Rescan M., D. Grulois, E. Ortega-Aboud, and L.-M. Chevin, 2019 Phenotypic Memory Drives  
791 Population Growth and Extinction Risk in a Random Environment
- 792 Rockman M. V, 2012 The QTN program and the alleles that matter for evolution: all that's gold does  
793 not glitter. *Evolution (N. Y.)*. 66: 1–17.
- 794 Scheiner S. M., 1993 Genetics and evolution of phenotypic plasticity. *Annu. Rev. Ecol. Syst.* 24: 35–

- 795 68.
- 796 Scheiner S. M., 1998 The genetics of phenotypic plasticity. VII. Evolution in a spatially-structured  
797 environment. *J. Evol. Biol.* 11: 303–320.
- 798 Schlichting C. D., and M. Pigliucci, 1998 *Phenotypic evolution: a reaction norm perspective*. Sinauer  
799 Sunderland, MA.
- 800 Sellis D., B. J. Callahan, D. A. Petrov, and P. W. Messer, 2011 Heterozygote advantage as a natural  
801 consequence of adaptation in diploids. *Proc Natl Acad Sci U S A* 108: 20666–20671.
- 802 Stapley J., J. Reger, P. G. D. Feulner, C. Smadja, J. Galindo, *et al.*, 2010 Adaptation genomics: the next  
803 generation. *Trends Ecol. Evol.*
- 804 Stephan W., T. H. E. Wiehe, and M. W. Lenz, 1992 The Effect of Strongly Selected Substitutions on  
805 Neutral Polymorphism: Analytical Results Based on Diffusion Theory. *Theor Popul Biol* 41: 237–  
806 254.
- 807 Stephan W., 2016 Signatures of positive selection: from selective sweeps at individual loci to subtle  
808 allele frequency changes in polygenic adaptation. *Mol. Ecol.* 25: 79–88.
- 809 Stetter M. G., K. Thornton, and J. Ross-Ibarra, 2018 Genetic architecture and selective sweeps after  
810 polygenic adaptation to distant trait optima. *PLoS Genet.*
- 811 Stocker T. F., D. Qin, G.-K. Plattner, L. V Alexander, S. K. Allen, *et al.*, 2013 Technical summary, pp.  
812 33–115 in *Climate Change 2013: The Physical Science Basis. Contribution of Working Group I to*  
813 *the Fifth Assessment Report of the Intergovernmental Panel on Climate Change*, Cambridge  
814 University Press.
- 815 Svardal H., C. Rueffler, and J. Hermisson, 2011 Comparing Environmental and Genetic Variance as  
816 Adaptive Response to Fluctuating Selection. *Evolution (N. Y.)*. 65: 2492–2513.
- 817 Takahata N., and M. Kimura, 1979 Genetic variability maintained in a finite population under mutation  
818 and autocorrelated random fluctuation of selection intensity. *Proc. Natl. Acad. Sci. U. S. A.* 76:  
819 5813–7.
- 820 Teshima K. M., and M. Przeworski, 2006 Directional positive selection on an allele of arbitrary  
821 dominance. *Genetics* 172: 713–718.
- 822 Thomas M. K., C. T. Kremer, C. A. Klausmeier, and E. Litchman, 2012 A global pattern of thermal  
823 adaptation in marine phytoplankton. *Science (80-. )*.
- 824 Tufto J., 2015 Genetic evolution, plasticity, and bet-hedging as adaptive responses to temporally  
825 autocorrelated fluctuating selection: A quantitative genetic model. *Evolution (N. Y.)*. 69: 2034–  
826 2049.
- 827 Turchin M. C., C. W. K. Chiang, C. D. Palmer, S. Sankararaman, D. Reich, *et al.*, 2012 Evidence of  
828 widespread selection on standing variation in Europe at height-associated SNPs. *Nat. Genet.*
- 829 Uecker H., and J. Hermisson, 2011 On the fixation process of a beneficial mutation in a variable  
830 environment. *Genetics*.
- 831 Vasseur D. A., and P. Yodzis, 2004 The color of environmental noise. *Ecology* 85: 1146–1152.

- 832 Via S., and R. Lande, 1985 Genotype-environment interaction and the evolution of phenotypic plasticity.  
833 Evolution (N. Y). 39: 505–522.
- 834 Wade M. J., and S. Kalisz, 1990 The causes of natural selection. Evolution (N. Y). 44: 1947–1955.
- 835 Wellenreuther M., and B. Hansson, 2016 Detecting Polygenic Evolution: Problems, Pitfalls, and  
836 Promises. Trends Genet.
- 837 West-Eberhard M. J., 2003 *Developmental plasticity and evolution*. Oxford University Press, USA.
- 838 Wright S., 1937 The Distribution of Gene Frequencies in Populations. Science (80- ). 85: 504.
- 839 Wright S., 1948 On the roles of directed and random changes in gene frequency in the genetics of  
840 populations. Evolution (N. Y). 279–294.
- 841 Yamazaki T., and T. Maruyama, 1972 Evidence for the Neutral Hypothesis of Protein Polymorphism.  
842 Science 178: 56–58.
- 843
- 844

845

846 **Figures**

847

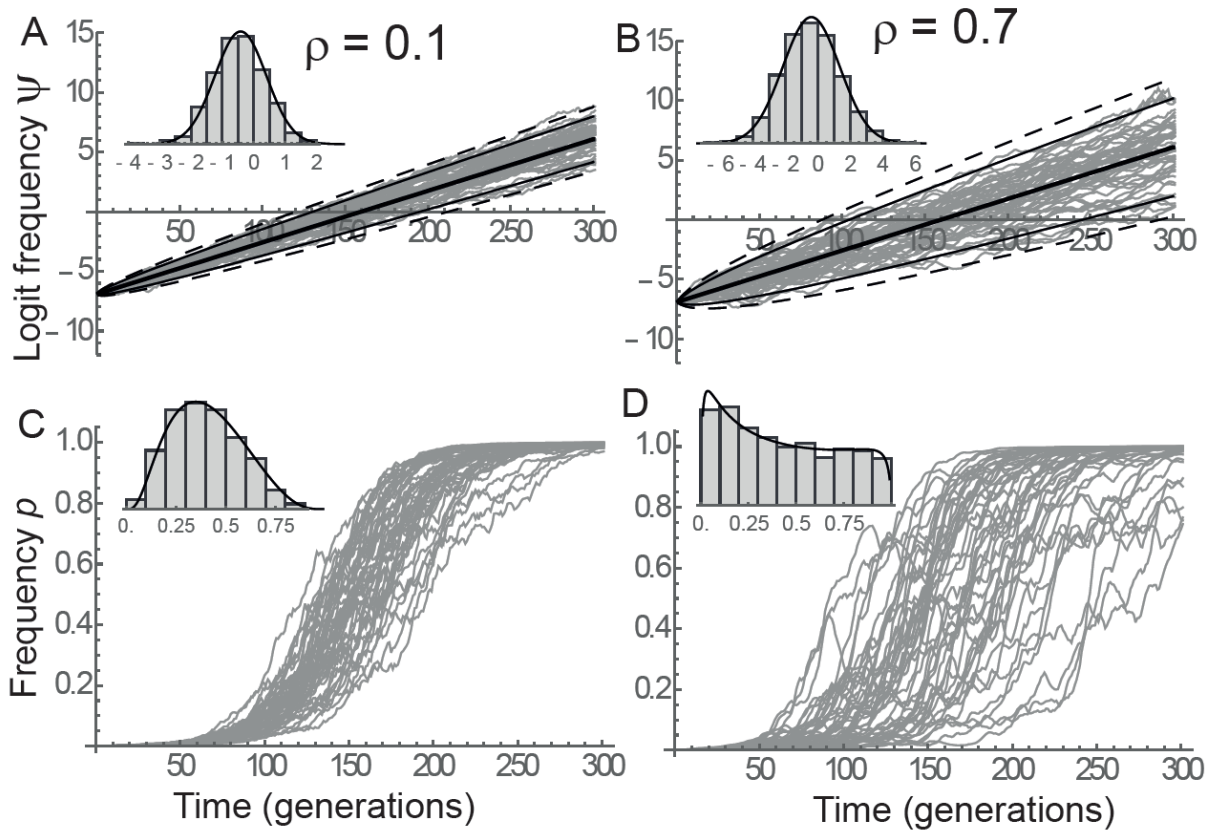

848

849

850 **Figure 1: Fluctuating selection at a QTL in a monomorphic genetic background.** The dynamics of  
 851 logit allelic frequency  $\psi$  (A-B) and allelic frequency  $p$  (C-D) are shown as gray lines for 50 simulations  
 852 with low ( $\rho = 0.1$ , left) or high ( $\rho = 0.7$ , right) positive autocorrelation in the optimum. Panels A-B  
 853 also show percentiles from the predicted normal distribution with mean and variance provided by eqs.  
 854 (15) and (17), respectively: 50% (median) in thick, 5% and 95% in thin, and 1% and 99% in dashed  
 855 lines. Insets show distributions at generation 150, where histograms are computed from 1000  
 856 simulations, while the solid black line is the predicted density based on the moments in eqs. (15) and  
 857 (17) for A-B, and their transformation using eq. (14) for C-D. Parameters were  $E(\theta) = 0$ ,  $\sigma_\theta^2 = 10$ ,  $\omega =$   
 858  $5$ ,  $m = -\omega/2$ ,  $\alpha = -m/5$ , and  $p_0 = 10^{-3}$ , and  $N_e = 10^6$ .

859

860

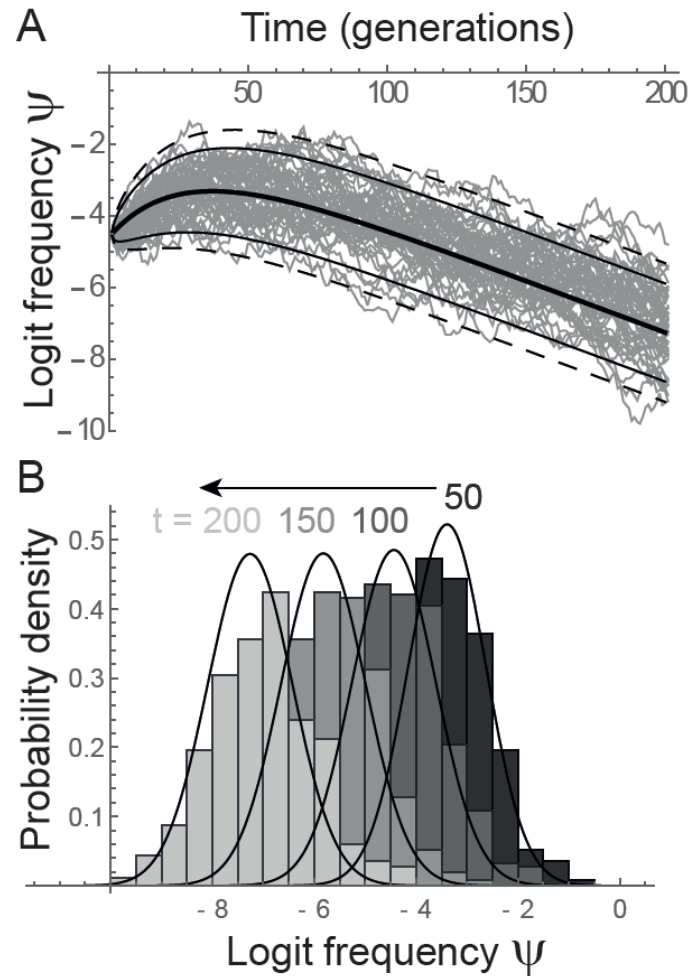

861

862

863 **Figure 2: Fluctuating selection at a QTL with a polygenic genetic background.** A: The dynamics of

864 logit allelic frequency  $\psi$  are shown as gray lines for 50 simulations. Also shown are percentiles from

865 the predicted normal distribution, with mean and variance given by eqs. (19) and (24), respectively: 50%

866 (median) in thick, 5% and 95% in thin, and 1% and 99% in dashed lines. B: Histograms show

867 distributions of  $\psi$  along time for 500 simulations, while the solid black lines are the predicted normal

868 densities based on eqs. (19) and (24). Note how the distribution reaches a stationary variance with a

869 moving mean, that is, a traveling wave with direction given by the arrow in B. Note also that in this

870 example, the sweep at the QTL is interrupted by the mean background evolving towards the optimum,

871 as investigated in detail in **Figure 4**. Parameters were  $E(\theta) = 0$ ,  $\sigma_{\theta}^2 = 10$ ,  $\rho = 0.1$ ,  $\omega = 5$ ,  $m_0 =$

872  $-\omega/2$ ,  $\alpha = -m_0/2$ ,  $G = 0.5$ ,  $p_0 = 10^{-2}$ , and  $N_e = 10^6$ .

873 .

874

875

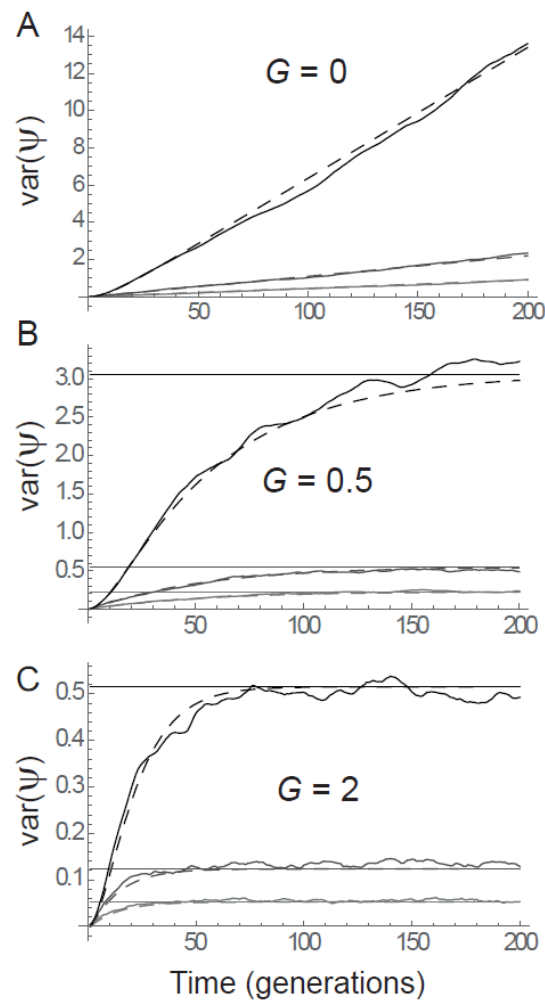

876

877

878 **Figure 3: Stochastic variance at the QTL with or without a polygenic background.** The variance  
879 across replicates of logit allelic frequency  $\psi$ , starting from a known frequency  $p_0$ , is represented along  
880 time in simulations without (A) or with (B, C) background polygenic variance for the trait. Also shown  
881 in dashed are the predicted dynamics based on equation (17) in A, and eq. (24) in B-C. Note the  
882 qualitative difference between the near linear increase in the absence of background genetic variance,  
883 versus the saturating dynamics with background genetic variance, for which the maximum asymptotic  
884 value from eq. (25) is also plotted as horizontal solid line. The autocorrelation of the optimum is  $\rho =$   
885 0.1 (gray),  $\rho = 0.5$  (dark gray) or  $\rho = 0.9$  (black), additive genetic variance in the background is  $G = 0$   
886 (A)  $G = 0.5$  (B) or  $G = 2$  (C), effective population size is  $N_e = 10^8$ , and other parameters are as in  
887 **Figure 1.**

888

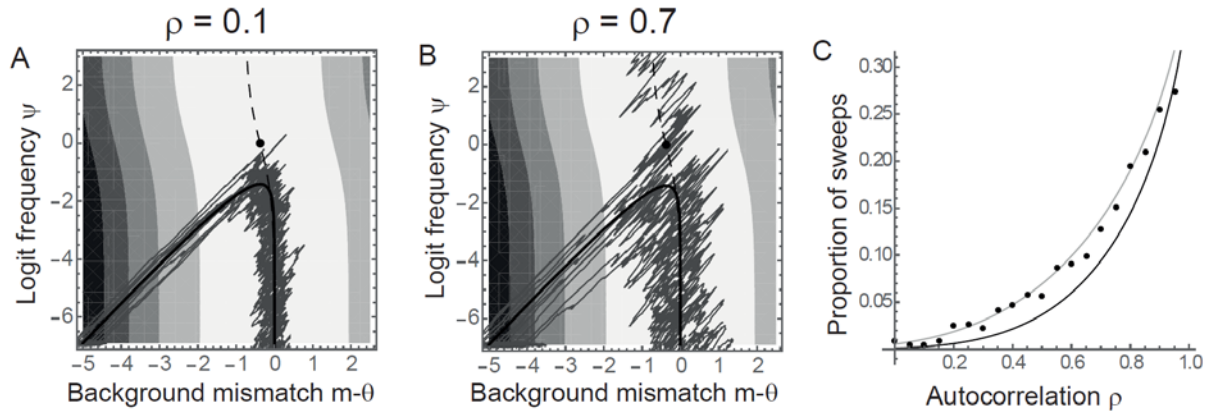

889

890

891

892 **Figure 4: Environmental autocorrelation and probability of a full sweep.** The bistability of genetic

893 architecture between major gene and polygenes in this system (eqs. 10-11) is amplified by stochastic

894 fluctuations in the environment. A-B: Joint evolutionary trajectories of logit allelic frequency  $\psi$  at the

895 major locus and background mean phenotypic deviation from the optimum  $m - \theta$  are represented for

896 10 sampled simulations (dark gray line). The thick black line represents the expected trajectory,

897 neglecting the influence of the QTL on the mean background, obtained by combining eq. (19) with the

898 geometric decline for  $m - \theta$ . Shadings represent the fitness landscape in the mean environment, using

899 eq. (7). The dashed line is where the overall mean phenotype is at the optimum,  $m + pa = \theta$ . All

900 equilibria lie on this line; the unstable equilibrium in eq. (11) is shown as a dot, while the fixed equilibria

901 in eq. 10 cannot be represented on the logit scale. C: The proportion of simulations where the mutation

902 at the QTL eventually reaches frequency higher than 0.95 (dots) is well predicted (lines) using a

903 Gaussian distribution for  $\psi$ , with equilibrium variance from eq. (25), and mean provided by the expected

904 trajectory at its maximum (eq. 21, black), or the actual maximum frequency in deterministic recursions

905 without environmental fluctuations (gray). For each autocorrelation  $\rho$  (ranging from 0 to 0.95 by

906 increments of 0.05), 1000 simulations were run, and the proportion of simulations with  $p > 0.95$  at

907 generation 2000 was recorded. The parameters for these simulations were  $G = 0.5$ ,  $E(\theta) = 0$ ,  $\sigma_\theta^2 = 5$ ,

908  $\omega = 5$ ,  $m_0 = -\omega$ ,  $\alpha = -0.15 m_0$ , and  $p_0 = 10^{-3}$ , and  $N_e = 10^6$ .

909

910

911

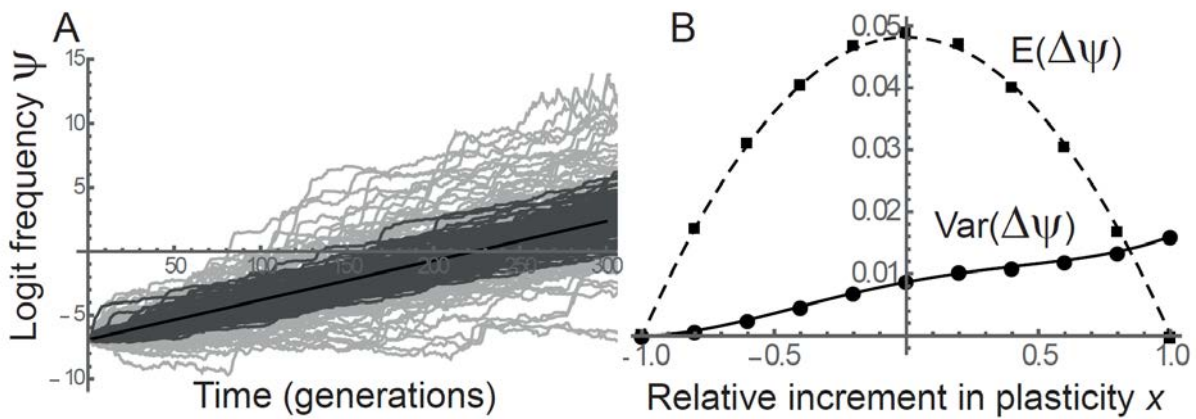

912

913

914 **Figure 5: Mean and variance of selection at a QTL for plasticity.** A: The dynamics of logit allelic  
 915 frequency  $\psi$  at the QTL are represented for simulations where the mutation at the QTL has a small  
 916 ( $b_\alpha = 0.4(b_\theta - b_m)$ , dark gray) or large ( $b_\alpha = 1.6(b_\theta - b_m)$ , light gray) effect on phenotypic  
 917 plasticity, with same expected selection coefficient materialized by the thick black line (based on eq.  
 918 27). B: The mean (dashed line: eq. (27); squares: simulations) and variance (continuous line: eq. (28);  
 919 dots: simulations) of selection coefficients  $\Delta\psi$  are shown as a function of the relative increment  $x$  in  
 920 plasticity caused by the mutation at the QTL, such that  $b_\alpha = (1 + x)(b_\theta - b_m)$ . This shows that  
 921 mutations with same expected selection coefficient may have different variances in selection, and more  
 922 so as they deviate more from the optimal plasticity  $\widehat{b}_\alpha = b_\theta - b_m$  (that is, from  $x = 0$ ). Parameters are  
 923  $\sigma_\theta^2 = 5$ ,  $\rho = 0.7$ ,  $\sigma_\varepsilon^2 = 2$ ,  $b_\theta = 1.4$ ,  $b_m = 0.2b_\theta$ ,  $a_\theta = a_m = a_\alpha = 0$ ; other parameters are as in  
 924 **Figure 1.**

925



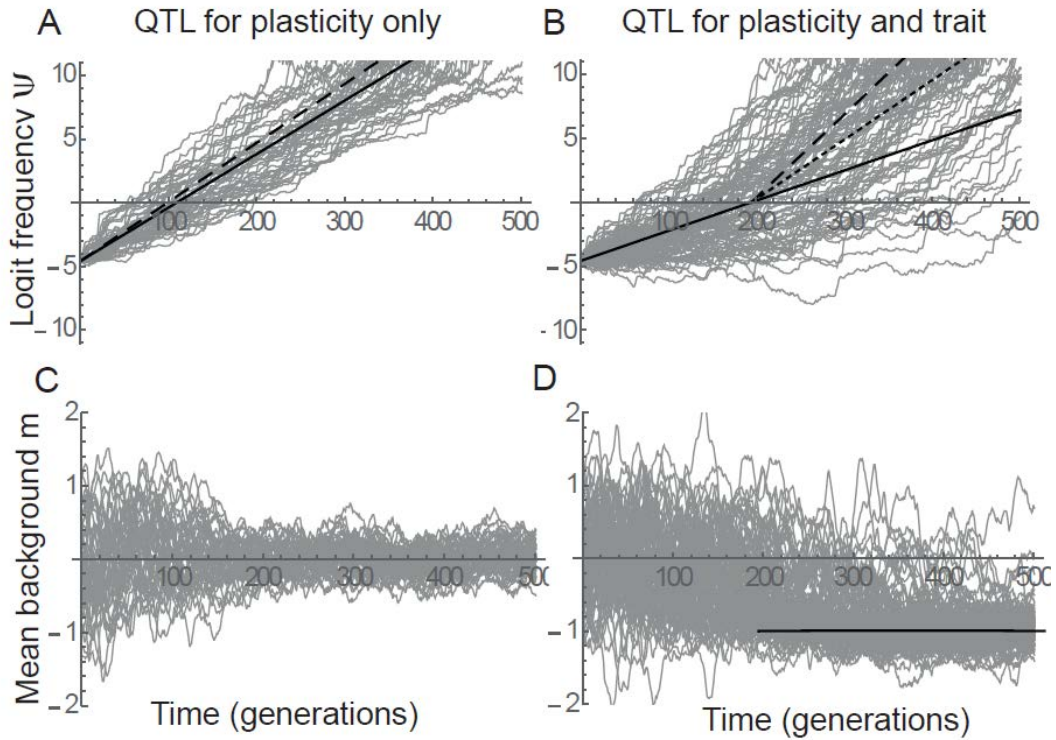

926  
927  
928

929 **Figure 6: Selection at a QTL for plasticity with background polygenic variation.** The dynamics of  
930 logit allelic frequency  $\psi$  at the QTL (A, B) and of the background mean reaction norm elevation  $a_m$  (C,  
931 D) are represented for the cases where the QTL affects only plasticity (with effect  $b_\alpha$  on reaction norm  
932 slope, A, C), or also the reaction norm intercept (with effect  $a_\alpha$ , B, D). In all cases, the gray line show  
933 100 simulations under a randomly changing environment. In panel A, the continuous black line  
934 represents the expected dynamics with the selection coefficient in eq. (29), while the dashed line is the  
935 prediction that neglects the influence of adaptive tracking of the optimum by the mean background (eq.  
936 27). In panel B, the continuous black line represents the selection coefficient that includes the pleiotropic  
937 fitness cost of reaction norm intercept ( $-Sa_\alpha^2/2$ ), the dashed line represents the selection coefficient that  
938 includes a reciprocal benefit  $+Sa_\alpha^2/2$ , and the dotted line neglect the pleiotropic effect altogether (as in  
939 A), after time  $t_c = \ln[(1 - p_0)/p_0]/E(\Delta\psi)$ . The higher stochastic variance in panel B relative to A is  
940 a consequence of the additional effect of the QTL on the reaction norm intercept, consistent with eq  
941 (28). In panel D, the black line represents the mean background reaction norm intercept after it has  
942 evolved to compensate for the pleiotropic effect of the QTL in the mean environment, such that  $a_m =$   
943  $a_\alpha$ . Parameters are  $G = 1$ ,  $a_{m0} = 0$ ,  $a_\alpha = 0$  (A, C) or  $a_\alpha = 1$  (B, D),  $b_\alpha = b_\theta - b_m$ ,  $p_0 = 10^{-2}$  and  
944 other parameters are as in **Figure 5**.

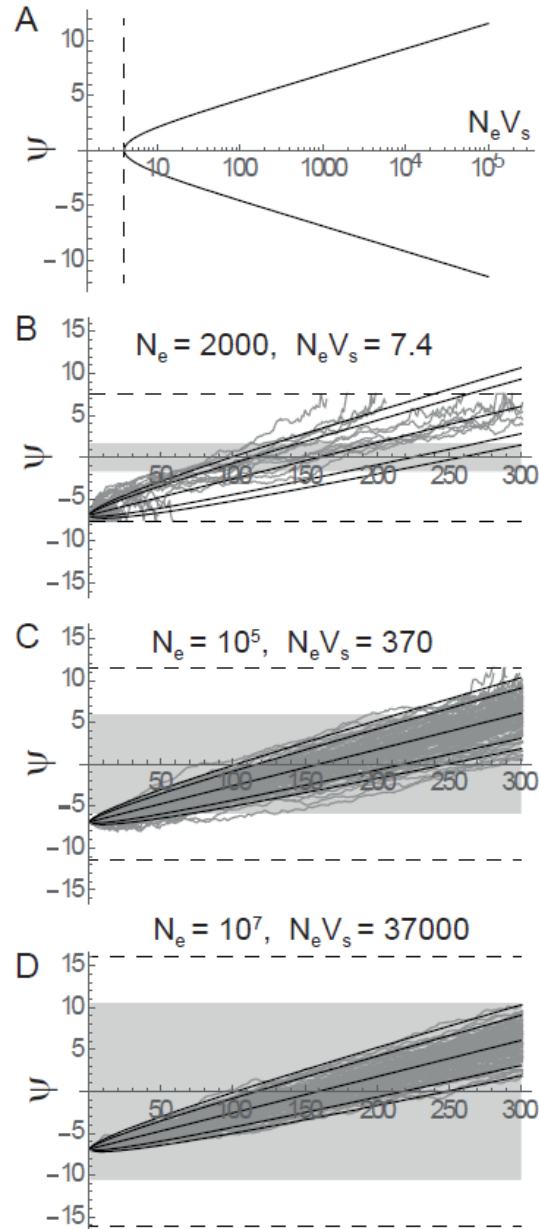

945

946 **Figure 7: Drift versus fluctuating selection.** A: The threshold logit frequency beyond which drift  
 947 dominates fluctuating selection as a source of stochasticity (from eq. 32, full line) is plotted against the  
 948 compound parameter  $N_e V_s$ . The dashed line represents the hard threshold at  $N_e V_s = 4$ . B-D: The  
 949 dynamics of logit allelic frequency  $\psi$  is plotted over time for 50 simulations with selection and drift,  
 950 and without plasticity or background genetic variation, similarly to **Figure 1**. The continuous lines show  
 951 the predicted quantile of the distribution, as in **Figure 1**. The shaded region indicates the range of  $\psi$   
 952 over which fluctuating selection is expected to dominate, using eq. (32) with  $V_s = (S\alpha\sigma_\theta)^2$ . The dashed  
 953 lines show the fixation threshold at  $\pm \ln N_e$ . The effective population sizes are indicated in each panel,  
 954 and other parameters are as in **Figure 1**.

955

## 956 Appendix: Details of plasticity model

957 In the model with plasticity, the environment is assumed to undergo stationary fluctuations, before and  
 958 after the appearance and spread of the mutation at the QTL. Before the mutation at the QTL reaches  
 959 appreciable frequency, the recursion for the mean background phenotype is (combining eqs. (2), (4), (6)  
 960 and (8))

$$961 \quad \Delta m = \Delta a_m = -GS[a_m + b_m \varepsilon - (a_\theta + b_\theta \varepsilon + \xi)].$$

962 Integrating over the distribution of environments of development  $\varepsilon$  and residual component of variance  
 963 in the optimum  $\xi$ , the expected mean reaction norm intercept at equilibrium in a stationary environment,  
 964 before the mutation at the QTL establishes and starts spreading, is

$$965 \quad E(a_m) = a_\theta + (b_\theta - b_m)\bar{\varepsilon} = \bar{\theta} - b_m\bar{\varepsilon}.$$

966 This shows that the mean reaction norm intercept evolves so as to compensate for the effect of plasticity,  
 967 such that the overall mean background phenotype  $E(m) = E(a_m) + b_m\bar{\varepsilon}$  is at the expected optimum  
 968  $\bar{\theta}$ . However, the intercept of a reaction norm has no meaning per se, as it depends on the arbitrary choice  
 969 of a reference environment where  $\varepsilon = 0$ . We thus choose to set as reference the stationary mean of the  
 970 environment of development, *de facto* setting  $\bar{\varepsilon} = 0$ . This is just a way of parameterizing the model such  
 971 that the intercept for the optimum is simply the stationary mean optimum,  $a_\theta = \bar{\theta}$ , which is also equal  
 972 to the expected reaction norm intercept  $E(a_m)$  in the absence of any influence from the QTL.

973 The recursion for the change in logit allelic frequency over a generation can be obtained by  
 974 combining equations (9) and (2-4), leading to

$$975 \quad \Delta\psi = -\frac{S}{2}[(a_\alpha + b_\alpha \varepsilon)^2 + 2(a_\alpha + b_\alpha \varepsilon)(a_m - a_\theta + (b_m - b_\theta)\varepsilon - \xi)]$$

976 which can be expanded to yield

$$977 \quad -\frac{2\Delta\psi}{S} = a_\alpha[a_\alpha + 2(a_m - a_\theta)] \\
 978 \quad \quad \quad + [b_\alpha^2 + 2b_\alpha(b_m - b_\theta)]\varepsilon^2 \\
 979 \quad \quad \quad + 2[a_\alpha b_\alpha + a_\alpha(b_m - b_\theta) + b_\alpha(a_m - a_\theta)]\varepsilon \\
 980 \quad \quad \quad - 2b_\alpha \varepsilon \xi - 2a_\alpha \xi.$$

981 Integrating over the distribution of environments of development  $\varepsilon$  and residual component of variance  
 982 in the optimum  $\xi$  yields

$$983 \quad -\frac{2E(\Delta\psi)}{S} = a_\alpha[a_\alpha + 2(E(a_m) - \bar{\theta})] + b_\alpha\{[(b_\alpha + 2(b_m - b_\theta))\sigma_\varepsilon^2 + 2\text{cov}(a_m, \varepsilon)\},$$

984 where the covariance  $\text{cov}(a_m, \varepsilon)$  is caused by adaptive tracking of the moving optimum phenotype by  
 985 evolution of the mean background phenotype. In the absence of polygenic variation during the sweep,  
 986 we have  $\text{cov}(a_m, \varepsilon) = 0$ , and  $E(a_m) - \bar{\theta}$  in the long run in a stationary environment, leading to eq. (27)  
 987 in the main text. With polygenic variance in the background, we have, from Michel et al. (2014),

$$988 \quad \text{cov}(a_m, \varepsilon) \approx \frac{SG(b_\theta - b_m)\sigma_\varepsilon^2}{SG - \ln(\rho)}.$$

989

990

991 The stochastic variance of logit frequency change is

$$992 \quad \text{Var}(\Delta\psi) = \frac{S^2}{4} \text{Var}[(a_\alpha + b_\alpha \varepsilon)^2 + 2(a_\alpha + b_\alpha \varepsilon)(a_m - a_\theta + (b_m - b_\theta)\varepsilon - \xi)]$$

993 In the absence of background genetic variance, we have

$$994 \quad \frac{4}{S^2} \text{Var}(\Delta\psi) = \text{Var}[(a_\alpha + b_\alpha \varepsilon)^2 + 2(a_\alpha + b_\alpha \varepsilon)(b_m - b_\theta)\varepsilon - 2(a_\alpha + b_\alpha \varepsilon)\xi]$$

$$995 \quad = \text{Var}[a_\alpha^2 + b_\alpha[b_\alpha + 2(b_m - b_\theta)]\varepsilon^2 + 2a_\alpha[b_\alpha + b_m - b_\theta]\varepsilon - 2b_\alpha\xi\varepsilon - 2a_\alpha\xi].$$

996 Integrating over the distribution of environments of development  $\varepsilon$  and residual component of variance  
997 in the optimum  $\xi$ , this yields

$$998 \quad \frac{4}{S^2} \text{Var}(\Delta\psi) = b_\alpha^2[b_\alpha + 2(b_m - b_\theta)]^2 \text{Var}[\varepsilon^2] + 4a_\alpha^2[b_\alpha + (b_m - b_\theta)]^2 \text{Var}[\varepsilon] + 4b_\alpha^2 \text{Var}[\xi\varepsilon] +$$

$$999 \quad 4a_\alpha^2 \text{Var}[\xi],$$

1000 where we have used the fact that, when  $\varepsilon$  and  $\xi$  are independent and with mean 0,

$$1001 \quad \text{Cov}(\varepsilon^2, \varepsilon) = \text{Cov}(\varepsilon^2, \xi\varepsilon) = \text{Cov}(\varepsilon^2, \xi) = \text{Cov}(\varepsilon, \xi\varepsilon) = \text{Cov}(\varepsilon, \xi) = \text{Cov}(\xi\varepsilon, \xi) = 0.$$

1002 We can also use

$$1003 \quad \text{Var}[\xi] = 1$$

$$1004 \quad \text{Var}[\varepsilon^2] = 2\sigma_\varepsilon^4$$

$$1005 \quad \text{Var}[\xi\varepsilon] = \text{E}[(\xi\varepsilon)^2] - \text{E}[\xi\varepsilon]^2 = \text{E}[\xi^2\varepsilon^2] = \text{Var}[\xi]\text{Var}[\varepsilon] = \sigma_\xi^2\sigma_\varepsilon^2$$

1006 To get

$$1007 \quad \frac{4}{S^2} \text{Var}(\Delta\psi) = 2b_\alpha^2[b_\alpha + 2(b_m - b_\theta)]^2\sigma_\varepsilon^4 + 4a_\alpha^2[b_\alpha + (b_m - b_\theta)]^2\sigma_\varepsilon^2 + 4\sigma_\xi^2(a_\alpha^2 + b_\alpha^2\sigma_\varepsilon^2)$$

1008 such that

$$1009 \quad \text{Var}(\Delta\psi) = \frac{S^2}{2} (b_\alpha^2[b_\alpha + 2(b_m - b_\theta)]^2\sigma_\varepsilon^4 + 2[a_\alpha^2(b_\alpha + b_m - b_\theta)^2 + \sigma_\xi^2 b_\alpha^2]\sigma_\varepsilon^2 + 2\sigma_\xi^2 a_\alpha^2)$$

1010 In the simpler case where the mutation only affects plasticity, but not the reaction norm intercept, this  
1011 simplifies as

$$1012 \quad \text{Var}(\Delta\psi) = \frac{S^2}{2} (b_\alpha^2[b_\alpha + 2(b_m - b_\theta)]^2\sigma_\varepsilon^4 + 2b_\alpha^2\sigma_\xi^2\sigma_\varepsilon^2)$$
